# Supplementary material for: Analysis of microRNA turnover in mammalian cells following Dicer1 ablation
Source: PubMed Central journal article supplement — Nucleic Acids Res. 2011 Mar 28;39(13):5692–703. doi: 10.1093/nar/gkr148 (PMC3141258; doi:10.1093/nar/gkr148), 2011-03-28
Supplement: supp_gkr148_Gantier_NAR_Revised-supplementary-data.pdf [file supp_gkr148_Gantier_NAR_Revised-supplementary-data.pdf]

## Supplementary Data

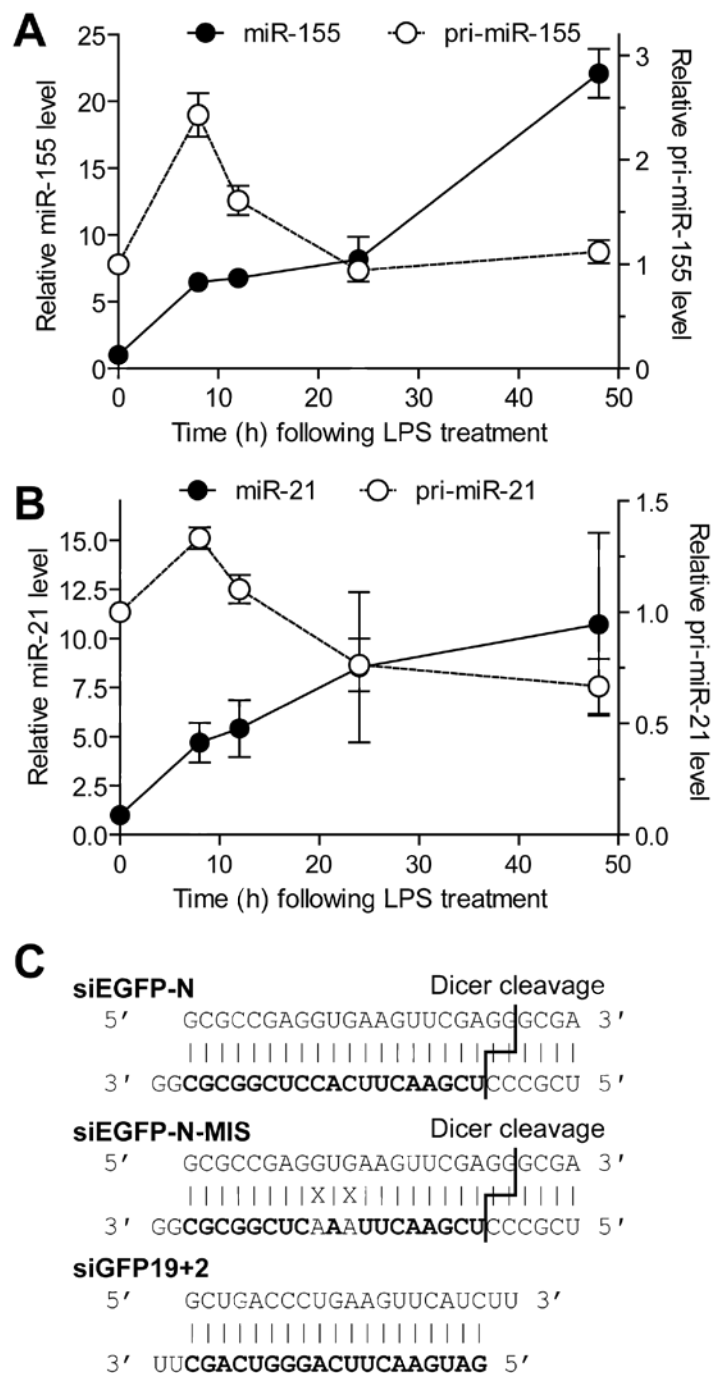

## Figure S1

**Supplementary Figure S1.** Persistence of miR-155 and miR-21 in primary B cells. (**A** and **B**) Primary splenic B cells were stimulated with interleukin-4 and LPS for the indicated amount of time and collected for RNA extraction. Expression levels of pri and mature miRNAs were determined by RT-qPCR, reported to that of the internal control (GAPDH and snoRNA-202, for the pri-miRNA and the mature miRNA, respectively) and are shown relative to the values at the initial time point. The values are averaged from three mice. (**C**) Schematic representation of Dicer1 siRNA substrate/product used in experiments presented in Figure 2B. Dicer1-predicted cleavage is indicated together with the targeting sequence of the guide strand in bold. Mismatches in siEGFP-N-MIS are indicated by X.

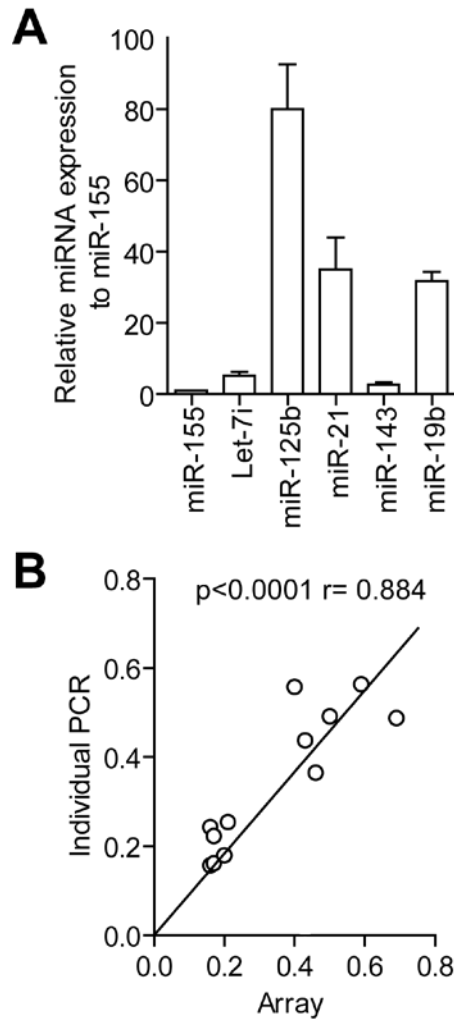

**Figure S2**

**Supplementary Figure S2.** Determination of a panel of miRNAs that represents the global miRNA population. **(A)** The snoRNA-202 normalized miRNA levels (e.g.  $\Delta C_q$  miR-21 =  $C_q$  miR-21 -  $C_q$  snoRNA202) were further reported to the levels of miR-155 (e.g.  $\Delta \Delta C_q = \Delta C_q$  miR-21 -  $\Delta C_q$  miR-155) and relative abundance of miRNAs to that of miR-155 in MEFs inferred from  $2^{(-\Delta \Delta C_q)}$  values. The data are averaged from biological triplicate and are representative of two independent experiments. SEM is shown. **(B)** Individual miRNA levels for the panel of six miRNAs at T=96 and T=120 h (relative to T=72 h) following OHT treatment are correlated between individual Taqman PCR datasets (Individual PCR – from Figure 2D) and low density array data (Array – from Figure 2C).

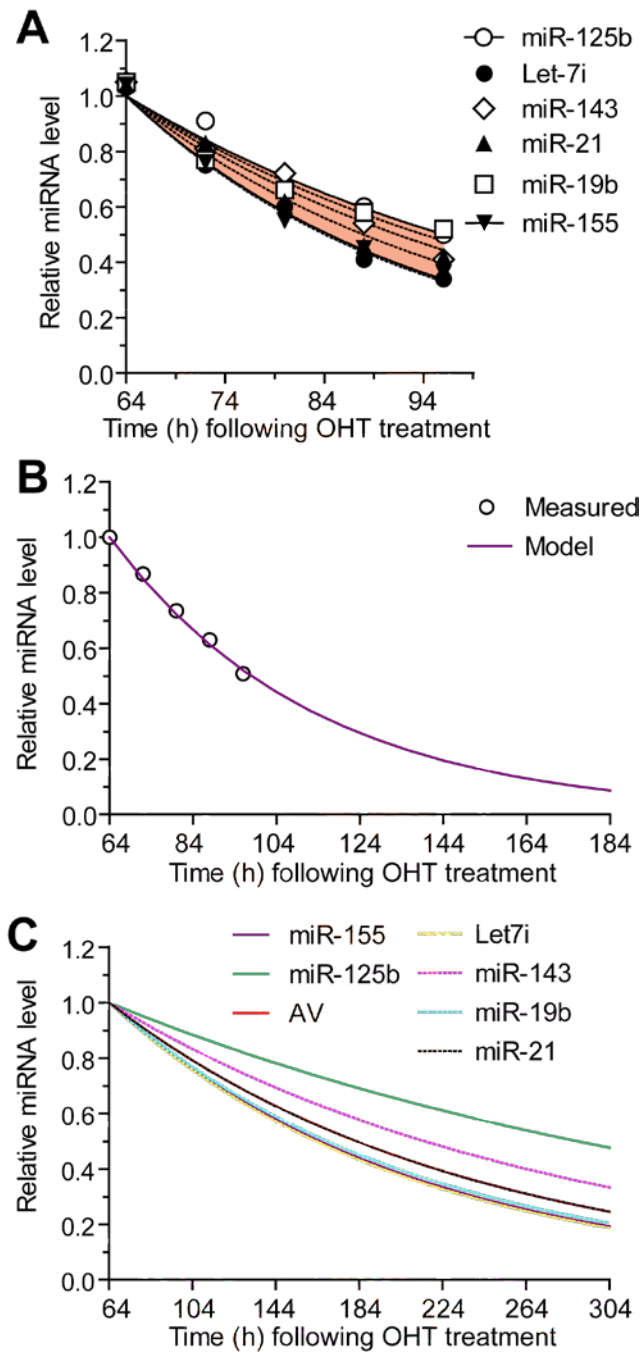

**Figure S3**

**Supplementary Figure S3.** Widespread decay of miRNAs in MEF cells. (A) Relative miRNA levels of each individual miRNA experimentally measured and used to determine the average miRNA decrease shown in Figure 3C. Each point is averaged from biological duplicate. (B) Fitted model of miRNA decay solely due to cell division – based on the measurement of cell proliferation shown in Figure 3B (Methods). (C) Individual predicted models of miRNA decay independent of cell division in a 100% recombined cell population. AV is the predicted decay from the average of the six miRNAs shown in Figure 3E.

**Supplementary Table S1.** Low density miRNA microarray data: identification and analysis of 104 miRNAs consistently decreasing with time.

**Supplementary Table S2.** Low density miRNA microarray data day 3 and 4: global miRNA expression analysis between day 3 and 4, including miRNAs that potentially rapidly degrade.

**Supplementary Table S3.** Low density miRNA microarray data day 4 and 5: global miRNA expression analysis between day 4 and 5, including miRNAs that potentially rapidly degrade.

**TABLE S1. Low density miRNA microarray data**

| Detection | miRNA name and reference | Ct values |       |       |
|-----------|--------------------------|-----------|-------|-------|
|           |                          | DAY3      | DAY4  | DAY5  |
| ND        | mmu-miR-1-4395333        | 40        | 36.99 | 40    |
| ND        | rno-miR-20b-3p-4395753   | 40        | 40    | 32.89 |
| ND        | mmu-miR-105-4395595      | 40        | 40    | 33.99 |
| ND        | mmu-miR-124-4373295      | 40        | 40    | 33.9  |
| ND        | mmu-miR-150-4373127      | 40        | 40    | 36.93 |
| ND        | mmu-miR-200c-4395411     | 40        | 40    | 34.99 |
| ND        | mmu-miR-215-4373316      | 40        | 40    | 35.97 |
| ND        | mmu-miR-294-4373326      | 40        | 35.99 | 35.2  |
| ND        | mmu-miR-295-4373327      | 40        | 40    | 35.96 |
| ND        | mmu-miR-302a-4378070     | 40        | 36.1  | 40    |
| ND        | rno-miR-333-4381109      | 40        | 32.69 | 32.9  |
| ND        | rno-miR-336-4381111      | 40        | 34.76 | 40    |
| ND        | mmu-miR-344-4373340      | 40        | 40    | 32.13 |
| ND        | rno-miR-344-3p-4381112   | 40        | 30.96 | 40    |
| ND        | rno-miR-344-5p-4395761   | 40        | 40    | 30.89 |
| ND        | mmu-miR-361-4373035      | 40        | 40    | 35.99 |
| ND        | mmu-miR-367-4373034      | 40        | 40    | 36.98 |
| ND        | mmu-miR-376a-4373347     | 40        | 40    | 35.15 |
| ND        | rno-miR-377-4381100      | 40        | 11.07 | 30.35 |
| ND        | mmu-miR-380-3p-4373350   | 40        | 35.99 | 40    |
| ND        | mmu-miR-381-4373020      | 40        | 34.03 | 30.55 |
| ND        | mmu-miR-384-5p-4395732   | 40        | 40    | 35.95 |
| ND        | mmu-miR-433-4373205      | 40        | 31.38 | 30.96 |
| ND        | rno-miR-466b-4395767     | 40        | 29.83 | 40    |
| ND        | mmu-miR-466h-4395646     | 40        | 40    | 27.09 |
| ND        | mmu-miR-467d-4395648     | 40        | 37.01 | 35.08 |
| ND        | mmu-miR-489-4378114      | 40        | 40    | 33.02 |
| ND        | mmu-miR-542-5p-4395693   | 40        | 40    | 34.97 |
| ND        | mmu-miR-590-5p-4395176   | 40        | 34.14 | 34.95 |
| ND        | mmu-miR-665-4395737      | 40        | 30.27 | 29.34 |
| ND        | mmu-miR-666-5p-4386770   | 40        | 30.72 | 28.81 |
| ND        | mmu-miR-743b-5p-4395600  | 40        | 17.85 | 33.09 |
| ND        | rno-miR-758-4395180      | 40        | 32.94 | 40    |
| ND        | rno-miR-878-4395771      | 40        | 40    | 32.25 |
| ND        | rno-miR-219-1-3p-4395778 | 40        | 34.09 | 40    |
| ND        | rno-miR-381-4381102      | 40        | 31.19 | 40    |
| ND        | mmu-miR-468-4373366      | 40        | 33.76 | 31.97 |
| ND        | mmu-miR-684-4381083      | 40        | 40    | 36.06 |
| ND        | mmu-miR-23a-4373074      | 40        | 32    | 40    |
| ND        | mmu-miR-107-4373154      | 40        | 40    | 40    |
| ND        | mmu-miR-122-4395356      | 40        | 40    | 40    |
| ND        | mmu-miR-133b-4395358     | 40        | 40    | 40    |
| ND        | mmu-miR-137-4373301      | 40        | 40    | 40    |
| ND        | mmu-miR-139-3p-4395676   | 40        | 40    | 40    |
| ND        | mmu-miR-142-3p-4373136   | 40        | 40    | 40    |
| ND        | mmu-miR-147-4395373      | 40        | 40    | 40    |
| ND        | mmu-miR-153-4373305      | 40        | 40    | 40    |
| ND        | mmu-miR-154-4373270      | 40        | 40    | 40    |
| ND        | mmu-miR-200a-4378069     | 40        | 40    | 40    |
| ND        | mmu-miR-201-4395708      | 40        | 40    | 40    |
| ND        | mmu-miR-202-5p-4395709   | 40        | 40    | 40    |
| ND        | mmu-miR-205-4373093      | 40        | 40    | 40    |
| ND        | mmu-miR-208b-4395401     | 40        | 40    | 40    |
| ND        | mmu-miR-216a-4395331     | 40        | 40    | 40    |
| ND        | mmu-miR-216b-4395437     | 40        | 40    | 40    |
| ND        | mmu-miR-219-4373080      | 40        | 40    | 40    |
| ND        | mmu-miR-291a-3p-4395722  | 40        | 40    | 40    |
| ND        | mmu-miR-291b-5p-4395667  | 40        | 40    | 40    |
| ND        | mmu-miR-292-3p-4395723   | 40        | 40    | 40    |
| ND        | mmu-miR-293-4386754      | 40        | 40    | 40    |
| ND        | mmu-miR-302c-4395688     | 40        | 40    | 40    |
| ND        | mmu-miR-302d-4373063     | 40        | 40    | 40    |
| ND        | mmu-miR-325-4395640      | 40        | 40    | 40    |
| ND        | mmu-miR-330-4395341      | 40        | 40    | 40    |
| ND        | mmu-miR-338-3p-4395363   | 40        | 40    | 40    |
| ND        | mmu-miR-346-4373342      | 40        | 40    | 40    |
| ND        | rno-miR-349-4381115      | 40        | 40    | 40    |
| ND        | mmu-miR-369-3p-4373032   | 40        | 40    | 40    |
| ND        | mmu-miR-370-4395386      | 40        | 40    | 40    |
| ND        | mmu-miR-377-4373025      | 40        | 40    | 40    |
| ND        | mmu-miR-384-3p-4395733   | 40        | 40    | 40    |
| ND        | mmu-miR-409-5p-4395442   | 40        | 40    | 40    |
| ND        | rno-miR-421-4381122      | 40        | 40    | 40    |
| ND        | mmu-miR-423-5p-4395451   | 40        | 40    | 40    |
| ND        | mmu-miR-429-4373355      | 40        | 40    | 40    |

|    |                          |       |       |       |
|----|--------------------------|-------|-------|-------|
| ND | mmu-miR-431-4395173      | 40    | 40    | 40    |
| ND | mmu-miR-448-4373206      | 40    | 40    | 40    |
| ND | mmu-miR-449b-4395669     | 40    | 40    | 40    |
| ND | mmu-miR-450a-5p-4395414  | 40    | 40    | 40    |
| ND | mmu-miR-453-4395614      | 40    | 40    | 40    |
| ND | mmu-miR-465b-5p-4395615  | 40    | 40    | 40    |
| ND | mmu-miR-470-4395718      | 40    | 40    | 40    |
| ND | mmu-miR-493-4395649      | 40    | 40    | 40    |
| ND | mmu-miR-497-4381046      | 40    | 40    | 40    |
| ND | mmu-miR-499-4381047      | 40    | 40    | 40    |
| ND | mmu-miR-501-3p-4381069   | 40    | 40    | 40    |
| ND | mmu-miR-504-4395195      | 40    | 40    | 40    |
| ND | mmu-miR-505-4381071      | 40    | 40    | 40    |
| ND | mmu-miR-509-5p-4395650   | 40    | 40    | 40    |
| ND | mmu-miR-539-4378103      | 40    | 40    | 40    |
| ND | mmu-miR-540-5p-4395691   | 40    | 40    | 40    |
| ND | ath-miR159a-4373390      | 40    | 40    | 40    |
| ND | rno-miR-543-4395766      | 40    | 40    | 40    |
| ND | mmu-miR-551b-4380945     | 40    | 40    | 40    |
| ND | mmu-miR-582-3p-4395697   | 40    | 40    | 40    |
| ND | mmu-miR-598-4395606      | 40    | 40    | 40    |
| ND | rno-miR-598-5p-4395754   | 40    | 40    | 40    |
| ND | mmu-miR-615-3p-4386777   | 40    | 40    | 40    |
| ND | mmu-miR-615-5p-4395464   | 40    | 40    | 40    |
| ND | mmu-miR-654-5p-4395652   | 40    | 40    | 40    |
| ND | mmu-miR-742-4395573      | 40    | 40    | 40    |
| ND | rno-miR-742-4395756      | 40    | 40    | 40    |
| ND | mmu-miR-743b-3p-4395601  | 40    | 40    | 40    |
| ND | rno-miR-760-5p-4395758   | 40    | 40    | 40    |
| ND | mmu-miR-770-3p-4395564   | 40    | 40    | 40    |
| ND | mmu-miR-802-4395566      | 40    | 40    | 40    |
| ND | mmu-miR-871-4395465      | 40    | 40    | 40    |
| ND | rno-miR-871-4395770      | 40    | 40    | 40    |
| ND | mmu-miR-874-4395379      | 40    | 40    | 40    |
| ND | mmu-miR-875-3p-4395677   | 40    | 40    | 40    |
| ND | mmu-miR-876-3p-4395594   | 40    | 40    | 40    |
| ND | mmu-miR-876-5p-4395593   | 40    | 40    | 40    |
| ND | mmu-miR-878-5p-4395670   | 40    | 40    | 40    |
| ND | mmu-miR-879-4395602      | 40    | 40    | 40    |
| ND | mmu-miR-881-4395739      | 40    | 40    | 40    |
| ND | rno-miR-881-4395773      | 40    | 40    | 40    |
| ND | mmu-miR-883a-3p-4395591  | 40    | 40    | 40    |
| ND | mmu-miR-883a-5p-4395741  | 40    | 40    | 40    |
| ND | rno-miR-219-2-3p-4395501 | 40    | 40    | 40    |
| ND | rno-miR-409-5p-4381098   | 40    | 40    | 40    |
| ND | rno-miR-450a-4381124     | 40    | 40    | 40    |
| ND | mmu-miR-452-4373281      | 40    | 40    | 40    |
| ND | mmu-miR-464-4373362      | 40    | 40    | 40    |
| ND | mmu-miR-469-4373367      | 40    | 40    | 40    |
| ND | mmu-miR-488-4381074      | 40    | 40    | 40    |
| ND | mmu-miR-496-4386771      | 40    | 40    | 40    |
| ND | rno-miR-505-4381097      | 40    | 40    | 40    |
| ND | mmu-miR-668-4386767      | 40    | 40    | 40    |
| ND | mmu-miR-670-4395561      | 40    | 40    | 40    |
| ND | mmu-miR-675-5p-4386761   | 40    | 40    | 40    |
| ND | mmu-miR-677-4381075      | 40    | 40    | 40    |
| ND | mmu-miR-679-4381077      | 40    | 40    | 40    |
| ND | mmu-miR-683-4381082      | 40    | 40    | 40    |
| ND | mmu-miR-686-4381085      | 40    | 40    | 40    |
| ND | mmu-miR-129-5p-4373171   | 40    | 40    | 40    |
| ND | mmu-miR-188-3p-4395217   | 40    | 40    | 40    |
| ND | mmu-miR-302b-4378071     | 40    | 40    | 40    |
| ND | mmu-miR-32-4395220       | 36.99 | 40    | 34.23 |
| ND | mmu-miR-337-3p-4395662   | 36.97 | 35.72 | 40    |
| ND | mmu-miR-184-4373113      | 36.44 | 40    | 36.93 |
| ND | rno-miR-673-4395755      | 36.21 | 37.19 | 40    |
| ND | mmu-miR-465a-3p-4395574  | 36.04 | 40    | 35.16 |
| ND | mmu-miR-323-3p-4395338   | 36.03 | 40    | 32.94 |
| ND | mmu-miR-380-5p-4395731   | 35.96 | 40    | 35.76 |
| ND | mmu-miR-434-3p-4395734   | 35.7  | 35.96 | 40    |
| ND | mmu-miR-542-3p-4378101   | 35.42 | 40    | 35.84 |
| ND | mmu-miR-142-5p-4395359   | 35.22 | 35.83 | 40    |
| ND | mmu-miR-672-4395438      | 35.11 | 40    | 37.7  |
| ND | rno-miR-466c-4395768     | 34.94 | 32.72 | 40    |
| ND | mmu-miR-7a-4378130       | 34.83 | 34.95 | 40    |
| ND | mmu-miR-138-4395395      | 34.58 | 35.98 | 40    |
| ND | rno-miR-343-4381123      | 34.53 | 40    | 33.09 |
| ND | mmu-miR-511-4395679      | 34.46 | 32.96 | 40    |
| ND | mmu-miR-297b-5p-4381049  | 34.04 | 33.22 | 40    |
| ND | mmu-miR-220-4395598      | 34.02 | 38.06 | 40    |

|                   |                         |              |              |           |                                     |             |             |
|-------------------|-------------------------|--------------|--------------|-----------|-------------------------------------|-------------|-------------|
| ND                | rno-miR-345-3p-4395762  | 33.94        | 40           | 34.72     |                                     |             |             |
| ND                | mmu-miR-652-4395463     | 33.75        | 34           | 40        |                                     |             |             |
| ND                | mmu-miR-181c-4373115    | 33.58        | 37.02        | 40        |                                     |             |             |
| ND                | mmu-miR-449a-4373207    | 33.5         | 34.98        | 40        |                                     |             |             |
| ND                | mmu-miR-340-5p-4395369  | 33.21        | 34.98        | 40        |                                     |             |             |
| ND                | mmu-miR-185-4395382     | 33.18        | 34.02        | 40        |                                     |             |             |
| ND                | mmu-miR-96-4373372      | 33.11        | 36.94        | 40        |                                     |             |             |
| ND                | mmu-miR-335-3p-4395296  | 32.77        | 40           | 33.98     |                                     |             |             |
| ND                | mmu-miR-125b-3p-4395489 | 32.52        | 40           | 33.99     |                                     |             |             |
| ND                | rno-miR-339-3p-4395760  | 32.49        | 40           | 35.95     |                                     |             |             |
| ND                | mmu-miR-134-4373299     | 32.28        | 34.01        | 40        |                                     |             |             |
| ND                | mmu-miR-682-4381081     | 32.05        | 40           | 32.81     |                                     |             |             |
| ND                | mmu-miR-503-4395586     | 31.99        | 40           | 33.97     |                                     |             |             |
| ND                | mmu-miR-183-4395380     | 31.96        | 33.89        | 40        |                                     |             |             |
| ND                | mmu-miR-351-4373345     | 31.89        | 40           | 34.24     |                                     |             |             |
| ND                | mmu-miR-337-5p-4395645  | 31.84        | 40           | 35.28     |                                     |             |             |
| ND                | mmu-miR-23b-4373073     | 31.77        | 33.97        | 40        |                                     |             |             |
| ND                | mmu-miR-873-4395467     | 31.7         | 40           | 34.08     |                                     |             |             |
| ND                | mmu-miR-187-4373307     | 31.58        | 33.92        | 40        |                                     |             |             |
| ND                | mmu-miR-129-3p-4373297  | 29.73        | 40           | 30.93     |                                     |             |             |
| ND                | mmu-miR-151-3p-4373304  | 28.97        | 31.03        | 40        |                                     |             |             |
| ND                | mmu-miR-324-3p-4395639  | 27.97        | 40           | 29.9      |                                     |             |             |
| ND                | mmu-miR-329-4373336     | 37.07        | 40           | 40        |                                     |             |             |
| Rapidly degraded? | mmu-miR-340-3p-4395370  | 36.96        | 40           | 40        |                                     |             |             |
| Rapidly degraded? | mmu-miR-200b-4395362    | 36.07        | 40           | 40        |                                     |             |             |
| Rapidly degraded? | mmu-miR-10b-4395329     | 36.01        | 40           | 40        |                                     |             |             |
| Rapidly degraded? | mmu-miR-148b-4373129    | 35.99        | 40           | 40        |                                     |             |             |
| Rapidly degraded? | mmu-miR-345-3p-4395659  | 35.99        | 40           | 40        |                                     |             |             |
| Rapidly degraded? | mmu-miR-382-4373019     | 35.98        | 40           | 40        |                                     |             |             |
| Rapidly degraded? | mmu-miR-7b-4395685      | 35.98        | 40           | 40        |                                     |             |             |
| Rapidly degraded? | mmu-miR-369-5p-4373195  | 35.97        | 40           | 40        |                                     |             |             |
| Rapidly degraded? | mmu-miR-543-4395487     | 35.96        | 40           | 40        |                                     |             |             |
| Rapidly degraded? | mmu-miR-451-4373360     | 35.96        | 40           | 40        |                                     |             |             |
| Rapidly degraded? | mmu-miR-18b-4395596     | 35.71        | 40           | 40        |                                     |             |             |
| Rapidly degraded? | mmu-miR-345-5p-4395658  | 35.16        | 40           | 40        |                                     |             |             |
| Rapidly degraded? | mmu-miR-133a-4395357    | 35.01        | 40           | 40        |                                     |             |             |
| Rapidly degraded? | mmu-miR-540-3p-4378119  | 34.99        | 40           | 40        |                                     |             |             |
| Rapidly degraded? | mmu-miR-582-5p-4395696  | 34.98        | 40           | 40        |                                     |             |             |
| Rapidly degraded? | mmu-miR-434-5p-4395711  | 34.98        | 40           | 40        |                                     |             |             |
| Rapidly degraded? | mmu-miR-217-4395686     | 34.55        | 40           | 40        |                                     |             |             |
| Rapidly degraded? | mmu-miR-455-4395585     | 34.09        | 40           | 40        |                                     |             |             |
| Rapidly degraded? | mmu-miR-342-5p-4395657  | 34.02        | 40           | 40        |                                     |             |             |
| Rapidly degraded? | mmu-miR-296-3p-4395212  | 34.02        | 40           | 40        |                                     |             |             |
| Rapidly degraded? | mmu-miR-211-4373315     | 33.03        | 40           | 40        |                                     |             |             |
| Rapidly degraded? | mmu-miR-199a-5p-4373272 | 33           | 40           | 40        |                                     |             |             |
| Rapidly degraded? | mmu-miR-467c-4395647    | 32.99        | 40           | 40        |                                     |             |             |
| Rapidly degraded? | mmu-miR-547-4395694     | 31.7         | 40           | 40        |                                     |             |             |
| Rapidly degraded? | mmu-miR-298-4395728     | 30.08        | 40           | 40        |                                     |             |             |
| Rapidly degraded? | mmu-miR-490-4373215     | 29.9         | 40           | 40        |                                     |             |             |
| Rapidly degraded? | mmu-miR-290-3p-4395721  | 13.67        | 40           | 40        |                                     |             |             |
| Housekeeping      | <b>MammU6-4395470</b>   | <b>18.56</b> | <b>18.75</b> | <b>18</b> |                                     |             |             |
| Housekeeping      | <b>MammU6-4395470</b>   | <b>18.56</b> | <b>18.75</b> | <b>18</b> |                                     |             |             |
| Housekeeping      | <b>MammU6-4395470</b>   | <b>18.56</b> | <b>18.75</b> | <b>18</b> | <b>2^(DDCt) using U6 as control</b> |             |             |
| Housekeeping      | <b>MammU6-4395470</b>   | <b>18.56</b> | <b>18.75</b> | <b>18</b> | <b>DAY3</b>                         | <b>DAY4</b> | <b>DAY5</b> |
| unconclusive      | mmu-miR-103-4373158     | 32.66        | 33.94        | 33        | 1                                   | 0.469       | 0.534       |
| unconclusive      | mmu-miR-125a-3p-4395310 | 31.34        | 34.82        | 32.26     | 1                                   | 0.102       | 0.357       |
| unconclusive      | mmu-miR-146a-4373132    | 31.49        | 32.96        | 32.09     | 1                                   | 0.411       | 0.445       |
| unconclusive      | mmu-miR-152-4395170     | 31.9         | 33.95        | 32.97     | 1                                   | 0.276       | 0.322       |
| unconclusive      | mmu-miR-15a-4373123     | 31           | 34.73        | 33.77     | 1                                   | 0.086       | 0.1         |
| unconclusive      | mmu-miR-190-4373110     | 30.96        | 34.87        | 31.93     | 1                                   | 0.076       | 0.344       |
| unconclusive      | mmu-miR-194-4373106     | 29.7         | 33.07        | 30.35     | 1                                   | 0.11        | 0.43        |
| unconclusive      | mmu-miR-208-4373091     | 28.68        | 29.94        | 28.68     | 1                                   | 0.475       | 0.674       |
| unconclusive      | mmu-miR-224-4395683     | 34.96        | 36.91        | 35.29     | 1                                   | 0.296       | 0.538       |
| unconclusive      | mmu-miR-335-5p-4373045  | 31.93        | 36.94        | 32.18     | 1                                   | 0.035       | 0.568       |
| unconclusive      | mmu-miR-339-3p-4395663  | 31.5         | 32.99        | 32        | 1                                   | 0.405       | 0.478       |
| unconclusive      | mmu-miR-34a-4395168     | 28.87        | 30.93        | 29.99     | 1                                   | 0.272       | 0.311       |
| unconclusive      | mmu-miR-34c-4373036     | 30.41        | 36.91        | 33.86     | 1                                   | 0.013       | 0.062       |
| unconclusive      | mmu-miR-375-4373027     | 34.05        | 35.94        | 34.79     | 1                                   | 0.308       | 0.406       |
| unconclusive      | mmu-miR-376c-4395580    | 32.49        | 35.97        | 33.27     | 1                                   | 0.102       | 0.395       |
| unconclusive      | mmu-miR-486-4378096     | 29.04        | 30.93        | 30.12     | 1                                   | 0.307       | 0.321       |
| unconclusive      | mmu-miR-494-4395476     | 32.25        | 32.98        | 32.18     | 1                                   | 0.687       | 0.711       |
| unconclusive      | mmu-miR-139-5p-4395400  | 35.94        | 38.42        | 32.34     | 1                                   | 0.204       | 8.219       |
| unconclusive      | mmu-miR-204-4373094     | 32.91        | 34.22        | 31.88     | 1                                   | 0.458       | 1.383       |
| unconclusive      | mmu-miR-675-3p-4386762  | 29.91        | 31.4         | 5.569     | 1                                   | 0.405       | 1E+07       |
| unconclusive      | mmu-miR-128a-4395327    | 35.06        | 33.91        | 35.99     | 1                                   | 2.531       | 0.356       |
| unconclusive      | mmu-miR-141-4373137     | 35.97        | 34.78        | 36.26     | 1                                   | 2.611       | 0.557       |
| unconclusive      | mmu-miR-148a-4373130    | 33.98        | 33.45        | 33.8      | 1                                   | 1.644       | 0.766       |
| unconclusive      | mmu-miR-192-4373108     | 33.32        | 32.72        | 32.96     | 1                                   | 1.73        | 0.867       |
| unconclusive      | mmu-miR-197-4373102     | 32.57        | 31.83        | 32.98     | 1                                   | 1.912       | 0.512       |
| unconclusive      | mmu-miR-223-4395406     | 33.97        | 32.74        | 34.32     | 1                                   | 2.658       | 0.529       |

|                           |                               |       |       |       |   |       |       |
|---------------------------|-------------------------------|-------|-------|-------|---|-------|-------|
| unconclusive              | mmu-miR-25-4373071            | 31.73 | 31.72 | 32.94 | 1 | 1.148 | 0.293 |
| unconclusive              | mmu-miR-27b-4373068           | 32.63 | 31.95 | 32.58 | 1 | 1.827 | 0.7   |
| unconclusive              | mmu-miR-297c-4395610          | 29.11 | 28.18 | 29.84 | 1 | 2.166 | 0.408 |
| unconclusive              | mmu-miR-331-5p-4395344        | 35.84 | 34    | 36.36 | 1 | 4.055 | 0.471 |
| unconclusive              | mmu-miR-350-4395660           | 34.69 | 33.46 | 35    | 1 | 2.675 | 0.544 |
| unconclusive              | mmu-miR-376b-4395582          | 34.98 | 34.52 | 35.77 | 1 | 1.575 | 0.393 |
| unconclusive              | mmu-miR-495-4381078           | 32.34 | 32.09 | 32.82 | 1 | 1.36  | 0.488 |
| unconclusive              | mmu-miR-500-4395736           | 33.25 | 33.03 | 35.34 | 1 | 1.324 | 0.159 |
| unconclusive              | mmu-miR-546-4381044           | 30.88 | 29.84 | 30.93 | 1 | 2.332 | 0.652 |
| unconclusive              | mmu-miR-708-4395452           | 32.41 | 31.96 | 35.97 | 1 | 1.545 | 0.057 |
| unconclusive              | mmu-miR-741-4395587           | 33.28 | 32.68 | 33.69 | 1 | 1.716 | 0.507 |
| unconclusive              | mmu-miR-743a-4395599          | 29.68 | 29.67 | 29.9  | 1 | 1.142 | 0.581 |
| unconclusive - not miRNA? | mmu-miR-202-3p-4373311        | 32.02 | 31.35 | 30.59 | 1 | 1.82  | 1.826 |
| unconclusive - not miRNA? | mmu-miR-362-3p-4395746        | 36.85 | 36.98 | 32.75 | 1 | 1.043 | 11.66 |
| unconclusive - not miRNA? | mmu-miR-450b-5p-4386779       | 33    | 32.57 | 30.99 | 1 | 1.534 | 2.72  |
| unconclusive - not miRNA? | <b>mmu-miR-680-4381079</b>    | 29.99 | 29.52 | 28.67 | 1 | 1.568 | 1.683 |
| unconclusive - not miRNA? | mmu-miR-410-4378093           | 36.89 | 32.08 | 34.63 | 1 | 31.93 | 3.253 |
| unconclusive - not miRNA? | <b>mmu-miR-509-3p-4395651</b> | 36.01 | 33.6  | 35.1  | 1 | 6.05  | 1.27  |
| unconclusive - not miRNA? | mmu-miR-98-4373009            | 35.99 | 34.12 | 34.83 | 1 | 4.168 | 1.509 |
| unconclusive - not miRNA? | mmu-miR-487b-4378102          | 35.98 | 34.52 | 34.5  | 1 | 3.119 | 1.89  |
| unconclusive - not miRNA? | mmu-miR-363-4378090           | 35.91 | 33.59 | 35.16 | 1 | 5.678 | 1.138 |
| unconclusive - not miRNA? | mmu-miR-544-4395680           | 35.18 | 34.04 | 33.93 | 1 | 2.511 | 1.612 |
| unconclusive - not miRNA? | mmu-miR-383-4381093           | 34.88 | 32.32 | 33.89 | 1 | 6.682 | 1.346 |
| unconclusive - not miRNA? | <b>mmu-miR-685-4386748</b>    | 32.04 | 29.56 | 30.42 | 1 | 6.356 | 2.083 |
| unconclusive - not miRNA? | mmu-miR-491-4381053           | 31.96 | 30.38 | 31.33 | 1 | 3.411 | 1.044 |
| unconclusive - not miRNA? | mmu-miR-465a-5p-4373363       | 31.72 | 31.03 | 31.12 | 1 | 1.839 | 1.022 |
| unconclusive - not miRNA? | mmu-miR-667-4386769           | 29.96 | 29.34 | 28.96 | 1 | 1.759 | 1.354 |
| unconclusive - not miRNA? | <b>mmu-miR-207-4373314</b>    | 29.55 | 28.11 | 27.46 | 1 | 3.096 | 2.886 |
| unconclusive - not miRNA? | <b>mmu-miR-687-4386750</b>    | 28.58 | 27.83 | 27.67 | 1 | 1.909 | 1.267 |
| Significantly expressed   | mmu-let-7a-4373169            | 31.49 | 34    | 35.16 | 1 | 0.2   | 0.053 |
| Significantly expressed   | mmu-let-7b-4373168            | 32.56 | 32.97 | 35.93 | 1 | 0.857 | 0.066 |
| Significantly expressed   | mmu-let-7c-4373167            | 30.77 | 31.53 | 32.95 | 1 | 0.675 | 0.15  |
| Significantly expressed   | mmu-let-7d-4395394            | 31.18 | 32.52 | 33.98 | 1 | 0.448 | 0.097 |
| Significantly expressed   | mmu-let-7e-4395517            | 29.36 | 30.98 | 31.75 | 1 | 0.37  | 0.129 |
| Significantly expressed   | mmu-let-7f-4373164            | 31.08 | 32.44 | 33.97 | 1 | 0.445 | 0.091 |
| Significantly expressed   | mmu-let-7g-4395393            | 29.88 | 30.98 | 31.93 | 1 | 0.533 | 0.163 |
| Significantly expressed   | mmu-let-7i-4395332            | 30.17 | 30.89 | 31.97 | 1 | 0.694 | 0.195 |
| Significantly expressed   | mmu-miR-100-4373160           | 30.39 | 31.06 | 31.98 | 1 | 0.718 | 0.225 |
| Significantly expressed   | mmu-miR-101a-4395364          | 32.67 | 35.61 | 35.97 | 1 | 0.148 | 0.068 |
| Significantly expressed   | mmu-miR-106a-4395589          | 25.62 | 27.18 | 27.95 | 1 | 0.386 | 0.135 |
| Significantly expressed   | mmu-miR-106b-4373155          | 31.41 | 31.95 | 33.25 | 1 | 0.78  | 0.189 |
| Significantly expressed   | mmu-miR-10a-4373153           | 31.12 | 34.2  | 36.92 | 1 | 0.134 | 0.012 |
| Significantly expressed   | mmu-miR-125a-5p-4395309       | 26.38 | 27.96 | 28.26 | 1 | 0.382 | 0.184 |
| Significantly expressed   | mmu-miR-125b-5p-4373148       | 25.95 | 27.45 | 27.98 | 1 | 0.403 | 0.167 |
| Significantly expressed   | mmu-miR-126-3p-4395339        | 30.26 | 31.96 | 32.93 | 1 | 0.349 | 0.106 |
| Significantly expressed   | mmu-miR-126-5p-4373269        | 32.75 | 32.96 | 34.9  | 1 | 0.982 | 0.152 |



|                         |                         |       |       |       |   |       |       |
|-------------------------|-------------------------|-------|-------|-------|---|-------|-------|
| Significantly expressed | mmu-miR-127-4373147     | 29.79 | 31.85 | 31.19 | 1 | 0.271 | 0.255 |
| Significantly expressed | mmu-miR-130a-4373145    | 31.32 | 32.98 | 32.35 | 1 | 0.359 | 0.33  |
| Significantly expressed | mmu-miR-130b-4373144    | 29.74 | 30.93 | 36.07 | 1 | 0.499 | 0.008 |
| Significantly expressed | mmu-miR-132-4373143     | 28    | 29.52 | 30.01 | 1 | 0.397 | 0.169 |
| Significantly expressed | mmu-miR-135a-4373140    | 32.48 | 33.37 | 36.99 | 1 | 0.614 | 0.03  |
| Significantly expressed | mmu-miR-135b-4395372    | 32.61 | 33.73 | 34.03 | 1 | 0.525 | 0.252 |
| Significantly expressed | mmu-miR-136-4395641     | 32.74 | 33.75 | 36.97 | 1 | 0.564 | 0.036 |
| Significantly expressed | mmu-miR-140-4373374     | 28.94 | 29.76 | 30.75 | 1 | 0.644 | 0.193 |
| Significantly expressed | mmu-miR-143-4395360     | 30    | 31.39 | 31.96 | 1 | 0.432 | 0.173 |
| Significantly expressed | mmu-miR-145-4395389     | 26.97 | 28.61 | 29.68 | 1 | 0.366 | 0.104 |
| Significantly expressed | mmu-miR-146b-4373178    | 31.26 | 32.56 | 34.99 | 1 | 0.465 | 0.051 |
| Significantly expressed | mmu-miR-155-4395701     | 28.6  | 29.93 | 30.67 | 1 | 0.456 | 0.162 |
| Significantly expressed | mmu-miR-15b-4373122     | 28.66 | 29.96 | 30.46 | 1 | 0.464 | 0.194 |
| Significantly expressed | mmu-miR-16-4373121      | 24.06 | 25.36 | 25.95 | 1 | 0.463 | 0.182 |
| Significantly expressed | mmu-miR-17-4395419      | 25.29 | 26.94 | 27.54 | 1 | 0.363 | 0.142 |
| Significantly expressed | mmu-miR-181a-4373117    | 34.65 | 34.97 | 34.42 | 1 | 0.914 | 0.794 |
| Significantly expressed | mmu-miR-182-4395729     | 29.14 | 30.74 | 30.97 | 1 | 0.375 | 0.19  |
| Significantly expressed | mmu-miR-186-4395396     | 28.46 | 29.4  | 29.94 | 1 | 0.594 | 0.243 |
| Significantly expressed | mmu-miR-188-5p-4395431  | 32.92 | 33.98 | 33.62 | 1 | 0.546 | 0.417 |
| Significantly expressed | mmu-miR-18a-4395533     | 32.98 | 33.9  | 33.96 | 1 | 0.603 | 0.342 |
| Significantly expressed | mmu-miR-191-4395410     | 25.96 | 27.31 | 27.91 | 1 | 0.447 | 0.176 |
| Significantly expressed | mmu-miR-193-4395361     | 31.96 | 32.96 | 33.87 | 1 | 0.572 | 0.181 |
| Significantly expressed | mmu-miR-193b-4395597    | 28.24 | 29.89 | 29.98 | 1 | 0.361 | 0.203 |
| Significantly expressed | mmu-miR-195-4373105     | 29.41 | 30.96 | 31.38 | 1 | 0.388 | 0.172 |
| Significantly expressed | mmu-miR-196b-4395326    | 30.73 | 31.97 | 32.9  | 1 | 0.48  | 0.15  |
| Significantly expressed | mmu-miR-199a-3p-4395415 | 27.3  | 28.73 | 29.97 | 1 | 0.421 | 0.106 |
| Significantly expressed | mmu-miR-19a-4373099     | 26.56 | 27.98 | 28.55 | 1 | 0.427 | 0.171 |
| Significantly expressed | mmu-miR-19b-4373098     | 23.29 | 24.49 | 24.97 | 1 | 0.496 | 0.212 |
| Significantly expressed | mmu-miR-203-4373095     | 32.72 | 33.94 | 33.97 | 1 | 0.487 | 0.284 |
| Significantly expressed | mmu-miR-20a-4373286     | 26.23 | 27.95 | 28.66 | 1 | 0.345 | 0.125 |
| Significantly expressed | mmu-miR-20b-4373263     | 31.86 | 34.53 | 34.97 | 1 | 0.178 | 0.078 |
| Significantly expressed | mmu-miR-210-4373089     | 27.77 | 29.15 | 30    | 1 | 0.437 | 0.144 |
| Significantly expressed | mmu-miR-21-4373090      | 26.92 | 27.87 | 28.98 | 1 | 0.591 | 0.162 |
| Significantly expressed | mmu-miR-214-4395417     | 27.83 | 29.24 | 30.97 | 1 | 0.427 | 0.077 |
| Significantly expressed | mmu-miR-218-4373081     | 29.31 | 30.93 | 31.95 | 1 | 0.369 | 0.108 |
| Significantly expressed | mmu-miR-221-4373077     | 27.74 | 31.03 | 30.62 | 1 | 0.117 | 0.092 |
| Significantly expressed | mmu-miR-222-4395387     | 25.57 | 26.42 | 26.93 | 1 | 0.63  | 0.265 |
| Significantly expressed | mmu-miR-24-4373072      | 24.11 | 25.45 | 25.97 | 1 | 0.449 | 0.186 |
| Significantly expressed | mmu-miR-26a-4395166     | 28.16 | 29.34 | 29.97 | 1 | 0.501 | 0.192 |
| Significantly expressed | mmu-miR-26b-4395167     | 28.88 | 29.97 | 30.53 | 1 | 0.536 | 0.215 |

|                         |                        |       |       |       |   |       |       |
|-------------------------|------------------------|-------|-------|-------|---|-------|-------|
| Significantly expressed | mmu-miR-27a-4373287    | 30.93 | 31.89 | 31.94 | 1 | 0.588 | 0.336 |
| Significantly expressed | mmu-miR-28-4373067     | 30.62 | 31.93 | 32.58 | 1 | 0.459 | 0.175 |
| Significantly expressed | mmu-miR-296-5p-4373066 | 29.93 | 30.74 | 30.98 | 1 | 0.65  | 0.327 |
| Significantly expressed | mmu-miR-29a-4395223    | 24.14 | 25.41 | 25.92 | 1 | 0.472 | 0.198 |
| Significantly expressed | mmu-miR-29b-4373288    | 33.29 | 33.96 | 34.61 | 1 | 0.717 | 0.271 |
| Significantly expressed | mmu-miR-29c-4395171    | 27.42 | 28.97 | 29.38 | 1 | 0.388 | 0.174 |
| Significantly expressed | mmu-miR-301a-4373064   | 30.95 | 31.49 | 33.58 | 1 | 0.783 | 0.109 |
| Significantly expressed | mmu-miR-301b-4395730   | 31.31 | 32.01 | 33.97 | 1 | 0.7   | 0.107 |
| Significantly expressed | mmu-miR-30a-4373061    | 30.81 | 31.93 | 32.72 | 1 | 0.523 | 0.18  |
| Significantly expressed | mmu-miR-30b-4373290    | 28.7  | 29.97 | 30.7  | 1 | 0.475 | 0.17  |
| Significantly expressed | mmu-miR-30c-4373060    | 28.93 | 29.79 | 30.96 | 1 | 0.629 | 0.166 |
| Significantly expressed | mmu-miR-30d-4373059    | 31.96 | 32.89 | 33.07 | 1 | 0.597 | 0.314 |
| Significantly expressed | mmu-miR-30e-4395334    | 28.91 | 30.35 | 30.52 | 1 | 0.421 | 0.222 |
| Significantly expressed | mmu-miR-31-4373331     | 24.8  | 25.73 | 25.96 | 1 | 0.599 | 0.304 |
| Significantly expressed | mmu-miR-320-4395388    | 29.96 | 30.75 | 31.43 | 1 | 0.658 | 0.244 |
| Significantly expressed | mmu-miR-322-4378107    | 31.67 | 32.68 | 35.99 | 1 | 0.562 | 0.034 |
| Significantly expressed | mmu-miR-324-5p-4373052 | 35.15 | 35.94 | 36.5  | 1 | 0.662 | 0.267 |
| Significantly expressed | mmu-miR-328-4373049    | 30.97 | 31.26 | 32.69 | 1 | 0.929 | 0.205 |
| Significantly expressed | mmu-miR-331-3p-4373046 | 30.09 | 31.46 | 31.98 | 1 | 0.44  | 0.182 |
| Significantly expressed | mmu-miR-339-5p-4395368 | 31.62 | 32.71 | 35.03 | 1 | 0.535 | 0.064 |
| Significantly expressed | mmu-miR-342-3p-4395371 | 29.97 | 31.63 | 31.75 | 1 | 0.359 | 0.197 |
| Significantly expressed | mmu-miR-34b-3p-4395748 | 28.7  | 29.65 | 29.96 | 1 | 0.589 | 0.282 |
| Significantly expressed | mmu-miR-365-4373194    | 30    | 31.94 | 32.05 | 1 | 0.296 | 0.163 |
| Significantly expressed | mmu-miR-379-4373349    | 30.37 | 31.05 | 34.03 | 1 | 0.712 | 0.054 |
| Significantly expressed | mmu-miR-409-3p-4395443 | 31.13 | 32.35 | 36.06 | 1 | 0.489 | 0.022 |
| Significantly expressed | mmu-miR-411-4381013    | 32.44 | 33.67 | 33.98 | 1 | 0.488 | 0.234 |
| Significantly expressed | mmu-miR-425-4380926    | 28.54 | 29.46 | 29.97 | 1 | 0.599 | 0.251 |
| Significantly expressed | mmu-miR-467a-4395717   | 31.68 | 33.5  | 35.97 | 1 | 0.322 | 0.034 |
| Significantly expressed | mmu-miR-467b-4381084   | 30.2  | 31.49 | 32    | 1 | 0.464 | 0.194 |
| Significantly expressed | mmu-miR-467e-4395698   | 30.32 | 32.02 | 31.68 | 1 | 0.35  | 0.263 |
| Significantly expressed | mmu-miR-484-4381032    | 25.1  | 26.33 | 26.95 | 1 | 0.486 | 0.188 |
| Significantly expressed | mmu-miR-532-3p-4395466 | 30.97 | 34.62 | 34.72 | 1 | 0.091 | 0.05  |
| Significantly expressed | mmu-miR-532-5p-4380928 | 30.55 | 32.36 | 32.97 | 1 | 0.324 | 0.126 |
| Significantly expressed | mmu-miR-574-3p-4395460 | 27.62 | 28.68 | 28.98 | 1 | 0.549 | 0.264 |
| Significantly expressed | mmu-miR-654-3p-4395350 | 33.19 | 34.1  | 33.77 | 1 | 0.607 | 0.453 |
| Significantly expressed | mmu-miR-669a-4381091   | 30.58 | 31.15 | 32.43 | 1 | 0.766 | 0.187 |
| Significantly expressed | mmu-miR-671-3p-4395433 | 33    | 34.94 | 35.97 | 1 | 0.297 | 0.087 |
| Significantly expressed | mmu-miR-674-4395193    | 29.26 | 30.12 | 32.02 | 1 | 0.627 | 0.1   |
| Significantly expressed | mmu-miR-676-4386776    | 29.51 | 31.12 | 31.96 | 1 | 0.373 | 0.124 |
| Significantly expressed | mmu-miR-744-4395435    | 31.2  | 32.62 | 35.99 | 1 | 0.426 | 0.024 |

|                         |                         |       |       |       |                                        |       |                           |
|-------------------------|-------------------------|-------|-------|-------|----------------------------------------|-------|---------------------------|
| Significantly expressed | mmu-miR-872-4395375     | 31.81 | 32.95 | 34.96 | 1                                      | 0.515 | 0.076                     |
| Significantly expressed | mmu-miR-883b-3p-4395695 | 32.43 | 33.17 | 33.12 | 1                                      | 0.683 | 0.418                     |
| Significantly expressed | mmu-miR-92a-4373013     | 26.94 | 28.54 | 28.55 | 1                                      | 0.375 | 0.221                     |
| Significantly expressed | mmu-miR-93-4373302      | 28.95 | 30.72 | 31.61 | 1                                      | 0.336 | 0.107                     |
| Significantly expressed | mmu-miR-9-4373285       | 30.69 | 31.97 | 32.32 | 1                                      | 0.47  | 0.218                     |
| Significantly expressed | mmu-miR-99a-4373008     | 29.98 | 31.5  | 32.22 | 1                                      | 0.399 | 0.143                     |
| Significantly expressed | mmu-miR-99b-4373007     | 29    | 29.73 | 30.77 | 1                                      | 0.686 | 0.197                     |
| Rat                     | rno-miR-1-4395765       | 33.99 | 32.49 | 33.83 |                                        |       |                           |
| Rat                     | rno-miR-17-3p-4395779   | 36.67 | 35.93 | 34.52 | 1                                      | 0.496 | 0.178 Averages            |
| Rat                     | rno-miR-190b-4395749    | 32.35 | 38.43 | 36.91 | 1                                      | 0.168 | 0.109 Standard Deviations |
| Rat                     | rno-miR-196c-4395750    | 32.2  | 33.41 | 35.98 |                                        |       |                           |
| Rat                     | rno-miR-207-4381096     | 28.94 | 28.87 | 28.68 | 104 Total miRNAs day 3 > day 4 > day 5 |       |                           |
| Rat                     | rno-miR-224-4373187     | 34.62 | 34.95 | 34.19 |                                        |       |                           |
| Rat                     | rno-miR-327-4381108     | 32.63 | 33.2  | 32.97 |                                        |       |                           |
| Rat                     | rno-miR-346-4381113     | 28.99 | 28.49 | 29.08 |                                        |       |                           |
| Rat                     | rno-miR-347-4381114     | 28.8  | 28.92 | 28.62 |                                        |       |                           |
| Rat                     | rno-miR-351-4395764     | 32.92 | 33.06 | 35.98 |                                        |       |                           |
| Rat                     | rno-miR-532-5p-4395752  | 30.92 | 32.86 | 34.97 |                                        |       |                           |
| Rat                     | rno-miR-743b-4395769    | 33.03 | 32.12 | 32    |                                        |       |                           |
| Housekeeping            | snoRNA135-4380912       | 25.96 | 26.41 | 25.96 |                                        |       |                           |
| Housekeeping            | snoRNA202-4380914       | 22.96 | 23.41 | 22.45 |                                        |       |                           |
| Housekeeping            | U87-4386735             | 28.68 | 28.96 | 28.41 |                                        |       |                           |
| Housekeeping            | Y1-4386739              | 29.96 | 30.27 | 29.69 |                                        |       |                           |

**Table S2. Low density miRNA microarray data day 3 and 4**

| Detection on day 3 | miRNA name and reference | Ct values |       |
|--------------------|--------------------------|-----------|-------|
|                    |                          | DAY3      | DAY4  |
| ND on day 3        | mmu-miR-1-4395333        | 40.00     | 36.99 |
| ND on day 3        | rno-miR-20b-3p-4395753   | 40.00     | 40.00 |
| ND on day 3        | mmu-miR-105-4395595      | 40.00     | 40.00 |
| ND on day 3        | mmu-miR-107-4373154      | 40.00     | 40.00 |
| ND on day 3        | mmu-miR-122-4395356      | 40.00     | 40.00 |
| ND on day 3        | mmu-miR-124-4373295      | 40.00     | 40.00 |
| ND on day 3        | mmu-miR-133b-4395358     | 40.00     | 40.00 |
| ND on day 3        | mmu-miR-137-4373301      | 40.00     | 40.00 |
| ND on day 3        | mmu-miR-139-3p-4395676   | 40.00     | 40.00 |
| ND on day 3        | mmu-miR-142-3p-4373136   | 40.00     | 40.00 |
| ND on day 3        | mmu-miR-147-4395373      | 40.00     | 40.00 |
| ND on day 3        | mmu-miR-150-4373127      | 40.00     | 40.00 |
| ND on day 3        | mmu-miR-153-4373305      | 40.00     | 40.00 |
| ND on day 3        | mmu-miR-154-4373270      | 40.00     | 40.00 |
| ND on day 3        | mmu-miR-200a-4378069     | 40.00     | 40.00 |
| ND on day 3        | mmu-miR-200c-4395411     | 40.00     | 40.00 |
| ND on day 3        | mmu-miR-201-4395708      | 40.00     | 40.00 |
| ND on day 3        | mmu-miR-202-5p-4395709   | 40.00     | 40.00 |
| ND on day 3        | mmu-miR-205-4373093      | 40.00     | 40.00 |
| ND on day 3        | mmu-miR-208b-4395401     | 40.00     | 40.00 |
| ND on day 3        | mmu-miR-215-4373316      | 40.00     | 40.00 |
| ND on day 3        | mmu-miR-216a-4395331     | 40.00     | 40.00 |
| ND on day 3        | mmu-miR-216b-4395437     | 40.00     | 40.00 |
| ND on day 3        | mmu-miR-219-4373080      | 40.00     | 40.00 |
| ND on day 3        | mmu-miR-291a-3p-4395722  | 40.00     | 40.00 |
| ND on day 3        | mmu-miR-291b-5p-4395667  | 40.00     | 40.00 |
| ND on day 3        | mmu-miR-292-3p-4395723   | 40.00     | 40.00 |
| ND on day 3        | mmu-miR-293-4386754      | 40.00     | 40.00 |
| ND on day 3        | mmu-miR-294-4373326      | 40.00     | 35.99 |
| ND on day 3        | mmu-miR-295-4373327      | 40.00     | 40.00 |
| ND on day 3        | mmu-miR-302a-4378070     | 40.00     | 36.10 |
| ND on day 3        | mmu-miR-302c-4395688     | 40.00     | 40.00 |
| ND on day 3        | mmu-miR-302d-4373063     | 40.00     | 40.00 |
| ND on day 3        | mmu-miR-325-4395640      | 40.00     | 40.00 |
| ND on day 3        | mmu-miR-330-4395341      | 40.00     | 40.00 |
| ND on day 3        | rno-miR-333-4381109      | 40.00     | 32.69 |
| ND on day 3        | rno-miR-336-4381111      | 40.00     | 34.76 |
| ND on day 3        | mmu-miR-338-3p-4395363   | 40.00     | 40.00 |
| ND on day 3        | mmu-miR-344-4373340      | 40.00     | 40.00 |
| ND on day 3        | rno-miR-344-3p-4381112   | 40.00     | 30.96 |
| ND on day 3        | rno-miR-344-5p-4395761   | 40.00     | 40.00 |
| ND on day 3        | mmu-miR-346-4373342      | 40.00     | 40.00 |
| ND on day 3        | rno-miR-349-4381115      | 40.00     | 40.00 |
| ND on day 3        | mmu-miR-361-4373035      | 40.00     | 40.00 |
| ND on day 3        | mmu-miR-367-4373034      | 40.00     | 40.00 |
| ND on day 3        | mmu-miR-369-3p-4373032   | 40.00     | 40.00 |
| ND on day 3        | mmu-miR-370-4395386      | 40.00     | 40.00 |
| ND on day 3        | mmu-miR-376a-4373347     | 40.00     | 40.00 |
| ND on day 3        | mmu-miR-377-4373025      | 40.00     | 40.00 |
| ND on day 3        | rno-miR-377-4381100      | 40.00     | 11.07 |
| ND on day 3        | mmu-miR-380-3p-4373350   | 40.00     | 35.99 |
| ND on day 3        | mmu-miR-381-4373020      | 40.00     | 34.03 |
| ND on day 3        | mmu-miR-384-3p-4395733   | 40.00     | 40.00 |
| ND on day 3        | mmu-miR-384-5p-4395732   | 40.00     | 40.00 |
| ND on day 3        | mmu-miR-409-5p-4395442   | 40.00     | 40.00 |
| ND on day 3        | rno-miR-421-4381122      | 40.00     | 40.00 |
| ND on day 3        | mmu-miR-423-5p-4395451   | 40.00     | 40.00 |
| ND on day 3        | mmu-miR-429-4373355      | 40.00     | 40.00 |
| ND on day 3        | mmu-miR-431-4395173      | 40.00     | 40.00 |
| ND on day 3        | mmu-miR-433-4373205      | 40.00     | 31.38 |
| ND on day 3        | mmu-miR-448-4373206      | 40.00     | 40.00 |
| ND on day 3        | mmu-miR-449b-4395669     | 40.00     | 40.00 |
| ND on day 3        | mmu-miR-450a-5p-4395414  | 40.00     | 40.00 |
| ND on day 3        | mmu-miR-453-4395614      | 40.00     | 40.00 |
| ND on day 3        | mmu-miR-465b-5p-4395615  | 40.00     | 40.00 |
| ND on day 3        | rno-miR-466b-4395767     | 40.00     | 29.83 |
| ND on day 3        | mmu-miR-466h-4395646     | 40.00     | 40.00 |
| ND on day 3        | mmu-miR-467d-4395648     | 40.00     | 37.01 |
| ND on day 3        | mmu-miR-470-4395718      | 40.00     | 40.00 |
| ND on day 3        | mmu-miR-489-4378114      | 40.00     | 40.00 |
| ND on day 3        | mmu-miR-493-4395649      | 40.00     | 40.00 |
| ND on day 3        | mmu-miR-497-4381046      | 40.00     | 40.00 |
| ND on day 3        | mmu-miR-499-4381047      | 40.00     | 40.00 |
| ND on day 3        | mmu-miR-501-3p-4381069   | 40.00     | 40.00 |
| ND on day 3        | mmu-miR-504-4395195      | 40.00     | 40.00 |
| ND on day 3        | mmu-miR-505-4381071      | 40.00     | 40.00 |
| ND on day 3        | mmu-miR-509-5p-4395650   | 40.00     | 40.00 |
| ND on day 3        | mmu-miR-539-4378103      | 40.00     | 40.00 |
| ND on day 3        | mmu-miR-540-5p-4395691   | 40.00     | 40.00 |

|              |                          |       |       |   |      |
|--------------|--------------------------|-------|-------|---|------|
| ND on day 3  | ath-miR159a-4373390      | 40.00 | 40.00 |   |      |
| ND on day 3  | mmu-miR-542-5p-4395693   | 40.00 | 40.00 |   |      |
| ND on day 3  | rno-miR-543-4395766      | 40.00 | 40.00 |   |      |
| ND on day 3  | mmu-miR-551b-4380945     | 40.00 | 40.00 |   |      |
| ND on day 3  | mmu-miR-582-3p-4395697   | 40.00 | 40.00 |   |      |
| ND on day 3  | mmu-miR-590-5p-4395176   | 40.00 | 34.14 |   |      |
| ND on day 3  | mmu-miR-598-4395606      | 40.00 | 40.00 |   |      |
| ND on day 3  | rno-miR-598-5p-4395754   | 40.00 | 40.00 |   |      |
| ND on day 3  | mmu-miR-615-3p-4386777   | 40.00 | 40.00 |   |      |
| ND on day 3  | mmu-miR-615-5p-4395464   | 40.00 | 40.00 |   |      |
| ND on day 3  | mmu-miR-654-5p-4395652   | 40.00 | 40.00 |   |      |
| ND on day 3  | mmu-miR-665-4395737      | 40.00 | 30.27 |   |      |
| ND on day 3  | mmu-miR-666-5p-4386770   | 40.00 | 30.72 |   |      |
| ND on day 3  | mmu-miR-742-4395573      | 40.00 | 40.00 |   |      |
| ND on day 3  | rno-miR-742-4395756      | 40.00 | 40.00 |   |      |
| ND on day 3  | mmu-miR-743b-3p-4395601  | 40.00 | 40.00 |   |      |
| ND on day 3  | mmu-miR-743b-5p-4395600  | 40.00 | 17.85 |   |      |
| ND on day 3  | rno-miR-758-4395180      | 40.00 | 32.94 |   |      |
| ND on day 3  | rno-miR-760-5p-4395758   | 40.00 | 40.00 |   |      |
| ND on day 3  | mmu-miR-770-3p-4395564   | 40.00 | 40.00 |   |      |
| ND on day 3  | mmu-miR-802-4395566      | 40.00 | 40.00 |   |      |
| ND on day 3  | mmu-miR-871-4395465      | 40.00 | 40.00 |   |      |
| ND on day 3  | rno-miR-871-4395770      | 40.00 | 40.00 |   |      |
| ND on day 3  | mmu-miR-874-4395379      | 40.00 | 40.00 |   |      |
| ND on day 3  | mmu-miR-875-3p-4395677   | 40.00 | 40.00 |   |      |
| ND on day 3  | mmu-miR-876-3p-4395594   | 40.00 | 40.00 |   |      |
| ND on day 3  | mmu-miR-876-5p-4395593   | 40.00 | 40.00 |   |      |
| ND on day 3  | rno-miR-878-4395771      | 40.00 | 40.00 |   |      |
| ND on day 3  | mmu-miR-878-5p-4395670   | 40.00 | 40.00 |   |      |
| ND on day 3  | mmu-miR-879-4395602      | 40.00 | 40.00 |   |      |
| ND on day 3  | mmu-miR-881-4395739      | 40.00 | 40.00 |   |      |
| ND on day 3  | rno-miR-881-4395773      | 40.00 | 40.00 |   |      |
| ND on day 3  | mmu-miR-883a-3p-4395591  | 40.00 | 40.00 |   |      |
| ND on day 3  | mmu-miR-883a-5p-4395741  | 40.00 | 40.00 |   |      |
| ND on day 3  | rno-miR-219-1-3p-4395778 | 40.00 | 34.09 |   |      |
| ND on day 3  | rno-miR-219-2-3p-4395501 | 40.00 | 40.00 |   |      |
| ND on day 3  | rno-miR-381-4381102      | 40.00 | 31.19 |   |      |
| ND on day 3  | rno-miR-409-5p-4381098   | 40.00 | 40.00 |   |      |
| ND on day 3  | rno-miR-450a-4381124     | 40.00 | 40.00 |   |      |
| ND on day 3  | mmu-miR-452-4373281      | 40.00 | 40.00 |   |      |
| ND on day 3  | mmu-miR-464-4373362      | 40.00 | 40.00 |   |      |
| ND on day 3  | mmu-miR-468-4373366      | 40.00 | 33.76 |   |      |
| ND on day 3  | mmu-miR-469-4373367      | 40.00 | 40.00 |   |      |
| ND on day 3  | mmu-miR-488-4381074      | 40.00 | 40.00 |   |      |
| ND on day 3  | mmu-miR-496-4386771      | 40.00 | 40.00 |   |      |
| ND on day 3  | rno-miR-505-4381097      | 40.00 | 40.00 |   |      |
| ND on day 3  | mmu-miR-668-4386767      | 40.00 | 40.00 |   |      |
| ND on day 3  | mmu-miR-670-4395561      | 40.00 | 40.00 |   |      |
| ND on day 3  | mmu-miR-675-5p-4386761   | 40.00 | 40.00 |   |      |
| ND on day 3  | mmu-miR-677-4381075      | 40.00 | 40.00 |   |      |
| ND on day 3  | mmu-miR-679-4381077      | 40.00 | 40.00 |   |      |
| ND on day 3  | mmu-miR-683-4381082      | 40.00 | 40.00 |   |      |
| ND on day 3  | mmu-miR-684-4381083      | 40.00 | 40.00 |   |      |
| ND on day 3  | mmu-miR-686-4381085      | 40.00 | 40.00 |   |      |
| ND on day 3  | mmu-miR-23a-4373074      | 40.00 | 32.00 |   |      |
| ND on day 3  | mmu-miR-129-5p-4373171   | 40.00 | 40.00 |   |      |
| ND on day 3  | mmu-miR-188-3p-4395217   | 40.00 | 40.00 |   |      |
| ND on day 3  | mmu-miR-302b-4378071     | 40.00 | 40.00 |   |      |
| unconclusive | mmu-miR-337-3p-4395662   | 36.97 | 35.72 | 1 | 2.71 |
| unconclusive | mmu-miR-7a-4378130       | 34.83 | 34.95 | 1 | 1.04 |
| unconclusive | mmu-miR-297b-5p-4381049  | 34.04 | 33.22 | 1 | 2.01 |
| unconclusive | mmu-miR-511-4395679      | 34.46 | 32.96 | 1 | 3.22 |
| unconclusive | rno-miR-466c-4395768     | 34.94 | 32.72 | 1 | 5.30 |
| unconclusive | mmu-miR-202-3p-4373311   | 32.02 | 31.35 | 1 | 1.82 |
| unconclusive | mmu-miR-362-3p-4395746   | 36.85 | 36.98 | 1 | 1.04 |
| unconclusive | mmu-miR-450b-5p-4386779  | 33.00 | 32.57 | 1 | 1.53 |
| unconclusive | mmu-miR-680-4381079      | 29.99 | 29.52 | 1 | 1.57 |
| unconclusive | rno-miR-17-3p-4395779    | 36.67 | 35.93 | 1 | 1.90 |
| unconclusive | mmu-miR-128a-4395327     | 35.06 | 33.91 | 1 | 2.53 |
| unconclusive | mmu-miR-141-4373137      | 35.97 | 34.78 | 1 | 2.61 |
| unconclusive | mmu-miR-148a-4373130     | 33.98 | 33.45 | 1 | 1.64 |
| unconclusive | mmu-miR-192-4373108      | 33.32 | 32.72 | 1 | 1.73 |
| unconclusive | mmu-miR-197-4373102      | 32.57 | 31.83 | 1 | 1.91 |
| unconclusive | mmu-miR-223-4395406      | 33.97 | 32.74 | 1 | 2.66 |
| unconclusive | mmu-miR-25-4373071       | 31.73 | 31.72 | 1 | 1.15 |
| unconclusive | mmu-miR-27b-4373068      | 32.63 | 31.95 | 1 | 1.83 |
| unconclusive | mmu-miR-297c-4395610     | 29.11 | 28.18 | 1 | 2.17 |
| unconclusive | mmu-miR-331-5p-4395344   | 35.84 | 34.00 | 1 | 4.06 |
| unconclusive | mmu-miR-350-4395660      | 34.69 | 33.46 | 1 | 2.68 |
| unconclusive | mmu-miR-376b-4395582     | 34.98 | 34.52 | 1 | 1.57 |
| unconclusive | mmu-miR-495-4381078      | 32.34 | 32.09 | 1 | 1.36 |
| unconclusive | mmu-miR-500-4395736      | 33.25 | 33.03 | 1 | 1.32 |
| unconclusive | mmu-miR-546-4381044      | 30.88 | 29.84 | 1 | 2.33 |
| unconclusive | mmu-miR-708-4395452      | 32.41 | 31.96 | 1 | 1.54 |
| unconclusive | mmu-miR-741-4395587      | 33.28 | 32.68 | 1 | 1.72 |

2<sup>^-</sup>(DDCt) using U6 as control  
**DAY3 DAY4**

|              |                         |       |       |   |       |
|--------------|-------------------------|-------|-------|---|-------|
| unconclusive | mmu-miR-743a-4395599    | 29.68 | 29.67 | 1 | 1.14  |
| unconclusive | mmu-miR-410-4378093     | 36.89 | 32.08 | 1 | 31.93 |
| unconclusive | mmu-miR-509-3p-4395651  | 36.01 | 33.60 | 1 | 6.05  |
| unconclusive | mmu-miR-98-4373009      | 35.99 | 34.12 | 1 | 4.17  |
| unconclusive | mmu-miR-487b-4378102    | 35.98 | 34.52 | 1 | 3.12  |
| unconclusive | mmu-miR-363-4378090     | 35.91 | 33.59 | 1 | 5.68  |
| unconclusive | mmu-miR-544-4395680     | 35.18 | 34.04 | 1 | 2.51  |
| unconclusive | mmu-miR-383-4381093     | 34.88 | 32.32 | 1 | 6.68  |
| unconclusive | mmu-miR-685-4386748     | 32.04 | 29.56 | 1 | 6.36  |
| unconclusive | mmu-miR-491-4381053     | 31.96 | 30.38 | 1 | 3.41  |
| unconclusive | mmu-miR-465a-5p-4373363 | 31.72 | 31.03 | 1 | 1.84  |
| unconclusive | mmu-miR-667-4386769     | 29.96 | 29.34 | 1 | 1.76  |
| unconclusive | mmu-miR-207-4373314     | 29.55 | 28.11 | 1 | 3.10  |
| unconclusive | mmu-miR-687-4386750     | 28.58 | 27.83 | 1 | 1.91  |
| rat          | rno-miR-1-4395765       | 33.99 | 32.49 | 1 | 3.21  |
| rat          | rno-miR-207-4381096     | 28.94 | 28.87 | 1 | 1.19  |
| rat          | rno-miR-346-4381113     | 28.99 | 28.49 | 1 | 1.61  |
| rat          | rno-miR-347-4381114     | 28.80 | 28.92 | 1 | 1.04  |
| rat          | rno-miR-351-4395764     | 32.92 | 33.06 | 1 | 1.04  |
| rat          | rno-miR-743b-4395769    | 33.03 | 32.12 | 1 | 2.14  |

---

|                         |                         |       |       |   |      |
|-------------------------|-------------------------|-------|-------|---|------|
| Significantly expressed | mmu-let-7a-4373169      | 31.49 | 34.00 | 1 | 0.20 |
| Significantly expressed | mmu-let-7b-4373168      | 32.56 | 32.97 | 1 | 0.86 |
| Significantly expressed | mmu-let-7c-4373167      | 30.77 | 31.53 | 1 | 0.68 |
| Significantly expressed | mmu-let-7d-4395394      | 31.18 | 32.52 | 1 | 0.45 |
| Significantly expressed | mmu-let-7e-4395517      | 29.36 | 30.98 | 1 | 0.37 |
| Significantly expressed | mmu-let-7f-4373164      | 31.08 | 32.44 | 1 | 0.45 |
| Significantly expressed | mmu-let-7g-4395393      | 29.88 | 30.98 | 1 | 0.53 |
| Significantly expressed | mmu-let-7i-4395332      | 30.17 | 30.89 | 1 | 0.69 |
| Significantly expressed | mmu-miR-100-4373160     | 30.39 | 31.06 | 1 | 0.72 |
| Significantly expressed | mmu-miR-101a-4395364    | 32.67 | 35.61 | 1 | 0.15 |
| Significantly expressed | mmu-miR-103-4373158     | 32.66 | 33.94 | 1 | 0.47 |
| Significantly expressed | mmu-miR-106a-4395589    | 25.62 | 27.18 | 1 | 0.39 |
| Significantly expressed | mmu-miR-106b-4373155    | 31.41 | 31.95 | 1 | 0.78 |
| Significantly expressed | mmu-miR-10a-4373153     | 31.12 | 34.20 | 1 | 0.13 |
| Significantly expressed | mmu-miR-10b-4395329     | 36.01 | 40.00 | 1 | 0.07 |
| Significantly expressed | mmu-miR-125a-3p-4395310 | 31.34 | 34.82 | 1 | 0.10 |
| Significantly expressed | mmu-miR-125a-5p-4395309 | 26.38 | 27.96 | 1 | 0.38 |
| Significantly expressed | mmu-miR-125b-3p-4395489 | 32.52 | 40.00 | 1 | 0.01 |
| Significantly expressed | mmu-miR-125b-5p-4373148 | 25.95 | 27.45 | 1 | 0.40 |
| Significantly expressed | mmu-miR-126-3p-4395339  | 30.26 | 31.96 | 1 | 0.35 |
| Significantly expressed | mmu-miR-126-5p-4373269  | 32.75 | 32.96 | 1 | 0.98 |
| Significantly expressed | mmu-miR-127-4373147     | 29.79 | 31.85 | 1 | 0.27 |
| Significantly expressed | mmu-miR-129-3p-4373297  | 29.73 | 40.00 | 1 | 0.00 |
| Significantly expressed | mmu-miR-130a-4373145    | 31.32 | 32.98 | 1 | 0.36 |
| Significantly expressed | mmu-miR-130b-4373144    | 29.74 | 30.93 | 1 | 0.50 |
| Significantly expressed | mmu-miR-132-4373143     | 28.00 | 29.52 | 1 | 0.40 |
| Significantly expressed | mmu-miR-133a-4395357    | 35.01 | 40.00 | 1 | 0.04 |
| Significantly expressed | mmu-miR-134-4373299     | 32.28 | 34.01 | 1 | 0.34 |
| Significantly expressed | mmu-miR-135a-4373140    | 32.48 | 33.37 | 1 | 0.61 |
| Significantly expressed | mmu-miR-135b-4395372    | 32.61 | 33.73 | 1 | 0.52 |
| Significantly expressed | mmu-miR-136-4395641     | 32.74 | 33.75 | 1 | 0.56 |
| Significantly expressed | mmu-miR-138-4395395     | 34.58 | 35.98 | 1 | 0.43 |

|                         |                         |       |       |   |      |
|-------------------------|-------------------------|-------|-------|---|------|
| Significantly expressed | mmu-miR-139-5p-4395400  | 35.94 | 38.42 | 1 | 0.20 |
| Significantly expressed | mmu-miR-140-4373374     | 28.94 | 29.76 | 1 | 0.64 |
| Significantly expressed | mmu-miR-142-5p-4395359  | 35.22 | 35.83 | 1 | 0.74 |
| Significantly expressed | mmu-miR-143-4395360     | 30.00 | 31.39 | 1 | 0.43 |
| Significantly expressed | mmu-miR-145-4395389     | 26.97 | 28.61 | 1 | 0.37 |
| Significantly expressed | mmu-miR-146a-4373132    | 31.49 | 32.96 | 1 | 0.41 |
| Significantly expressed | mmu-miR-146b-4373178    | 31.26 | 32.56 | 1 | 0.46 |
| Significantly expressed | mmu-miR-148b-4373129    | 35.99 | 40.00 | 1 | 0.07 |
| Significantly expressed | mmu-miR-151-3p-4373304  | 28.97 | 31.03 | 1 | 0.27 |
| Significantly expressed | mmu-miR-152-4395170     | 31.90 | 33.95 | 1 | 0.28 |
| Significantly expressed | mmu-miR-155-4395701     | 28.60 | 29.93 | 1 | 0.46 |
| Significantly expressed | mmu-miR-15a-4373123     | 31.00 | 34.73 | 1 | 0.09 |
| Significantly expressed | mmu-miR-15b-4373122     | 28.66 | 29.96 | 1 | 0.46 |
| Significantly expressed | mmu-miR-16-4373121      | 24.06 | 25.36 | 1 | 0.46 |
| Significantly expressed | mmu-miR-17-4395419      | 25.29 | 26.94 | 1 | 0.36 |
| Significantly expressed | mmu-miR-181a-4373117    | 34.65 | 34.97 | 1 | 0.91 |
| Significantly expressed | mmu-miR-181c-4373115    | 33.58 | 37.02 | 1 | 0.11 |
| Significantly expressed | mmu-miR-182-4395729     | 29.14 | 30.74 | 1 | 0.37 |
| Significantly expressed | mmu-miR-183-4395380     | 31.96 | 33.89 | 1 | 0.30 |
| Significantly expressed | mmu-miR-184-4373113     | 36.44 | 40.00 | 1 | 0.10 |
| Significantly expressed | mmu-miR-185-4395382     | 33.18 | 34.02 | 1 | 0.64 |
| Significantly expressed | mmu-miR-186-4395396     | 28.46 | 29.40 | 1 | 0.59 |
| Significantly expressed | mmu-miR-187-4373307     | 31.58 | 33.92 | 1 | 0.23 |
| Significantly expressed | mmu-miR-188-5p-4395431  | 32.92 | 33.98 | 1 | 0.55 |
| Significantly expressed | mmu-miR-18a-4395533     | 32.98 | 33.90 | 1 | 0.60 |
| Significantly expressed | mmu-miR-18b-4395596     | 35.71 | 40.00 | 1 | 0.06 |
| Significantly expressed | mmu-miR-190-4373110     | 30.96 | 34.87 | 1 | 0.08 |
| Significantly expressed | mmu-miR-191-4395410     | 25.96 | 27.31 | 1 | 0.45 |
| Significantly expressed | mmu-miR-193-4395361     | 31.96 | 32.96 | 1 | 0.57 |
| Significantly expressed | mmu-miR-193b-4395597    | 28.24 | 29.89 | 1 | 0.36 |
| Significantly expressed | mmu-miR-194-4373106     | 29.70 | 33.07 | 1 | 0.11 |
| Significantly expressed | mmu-miR-195-4373105     | 29.41 | 30.96 | 1 | 0.39 |
| Significantly expressed | mmu-miR-196b-4395326    | 30.73 | 31.97 | 1 | 0.48 |
| Significantly expressed | mmu-miR-199a-3p-4395415 | 27.30 | 28.73 | 1 | 0.42 |
| Significantly expressed | mmu-miR-199a-5p-4373272 | 33.00 | 40.00 | 1 | 0.01 |
| Significantly expressed | mmu-miR-19a-4373099     | 26.56 | 27.98 | 1 | 0.43 |
| Significantly expressed | mmu-miR-19b-4373098     | 23.29 | 24.49 | 1 | 0.50 |
| Significantly expressed | mmu-miR-200b-4395362    | 36.07 | 40.00 | 1 | 0.07 |
| Significantly expressed | mmu-miR-203-4373095     | 32.72 | 33.94 | 1 | 0.49 |
| Significantly expressed | mmu-miR-204-4373094     | 32.91 | 34.22 | 1 | 0.46 |
| Significantly expressed | mmu-miR-208-4373091     | 28.68 | 29.94 | 1 | 0.47 |
| Significantly expressed | mmu-miR-20a-4373286     | 26.23 | 27.95 | 1 | 0.35 |

|                         |                        |       |       |   |      |
|-------------------------|------------------------|-------|-------|---|------|
| Significantly expressed | mmu-miR-20b-4373263    | 31.86 | 34.53 | 1 | 0.18 |
| Significantly expressed | mmu-miR-210-4373089    | 27.77 | 29.15 | 1 | 0.44 |
| Significantly expressed | mmu-miR-211-4373315    | 33.03 | 40.00 | 1 | 0.01 |
| Significantly expressed | mmu-miR-21-4373090     | 26.92 | 27.87 | 1 | 0.59 |
| Significantly expressed | mmu-miR-214-4395417    | 27.83 | 29.24 | 1 | 0.43 |
| Significantly expressed | mmu-miR-217-4395686    | 34.55 | 40.00 | 1 | 0.03 |
| Significantly expressed | mmu-miR-218-4373081    | 29.31 | 30.93 | 1 | 0.37 |
| Significantly expressed | mmu-miR-220-4395598    | 34.02 | 38.06 | 1 | 0.07 |
| Significantly expressed | mmu-miR-221-4373077    | 27.74 | 31.03 | 1 | 0.12 |
| Significantly expressed | mmu-miR-222-4395387    | 25.57 | 26.42 | 1 | 0.63 |
| Significantly expressed | mmu-miR-224-4395683    | 34.96 | 36.91 | 1 | 0.30 |
| Significantly expressed | mmu-miR-23b-4373073    | 31.77 | 33.97 | 1 | 0.25 |
| Significantly expressed | mmu-miR-24-4373072     | 24.11 | 25.45 | 1 | 0.45 |
| Significantly expressed | mmu-miR-26a-4395166    | 28.16 | 29.34 | 1 | 0.50 |
| Significantly expressed | mmu-miR-26b-4395167    | 28.88 | 29.97 | 1 | 0.54 |
| Significantly expressed | mmu-miR-27a-4373287    | 30.93 | 31.89 | 1 | 0.59 |
| Significantly expressed | mmu-miR-28-4373067     | 30.62 | 31.93 | 1 | 0.46 |
| Significantly expressed | mmu-miR-290-3p-4395721 | 13.67 | 40.00 | 1 | 0.00 |
| Significantly expressed | mmu-miR-296-3p-4395212 | 34.02 | 40.00 | 1 | 0.02 |
| Significantly expressed | mmu-miR-296-5p-4373066 | 29.93 | 30.74 | 1 | 0.65 |
| Significantly expressed | mmu-miR-298-4395728    | 30.08 | 40.00 | 1 | 0.00 |
| Significantly expressed | mmu-miR-29a-4395223    | 24.14 | 25.41 | 1 | 0.47 |
| Significantly expressed | mmu-miR-29b-4373288    | 33.29 | 33.96 | 1 | 0.72 |
| Significantly expressed | mmu-miR-29c-4395171    | 27.42 | 28.97 | 1 | 0.39 |
| Significantly expressed | mmu-miR-301a-4373064   | 30.95 | 31.49 | 1 | 0.78 |
| Significantly expressed | mmu-miR-301b-4395730   | 31.31 | 32.01 | 1 | 0.70 |
| Significantly expressed | mmu-miR-30a-4373061    | 30.81 | 31.93 | 1 | 0.52 |
| Significantly expressed | mmu-miR-30b-4373290    | 28.70 | 29.97 | 1 | 0.47 |
| Significantly expressed | mmu-miR-30c-4373060    | 28.93 | 29.79 | 1 | 0.63 |
| Significantly expressed | mmu-miR-30d-4373059    | 31.96 | 32.89 | 1 | 0.60 |
| Significantly expressed | mmu-miR-30e-4395334    | 28.91 | 30.35 | 1 | 0.42 |
| Significantly expressed | mmu-miR-31-4373331     | 24.80 | 25.73 | 1 | 0.60 |
| Significantly expressed | mmu-miR-320-4395388    | 29.96 | 30.75 | 1 | 0.66 |
| Significantly expressed | mmu-miR-322-4378107    | 31.67 | 32.68 | 1 | 0.56 |
| Significantly expressed | mmu-miR-323-3p-4395338 | 36.03 | 40.00 | 1 | 0.07 |
| Significantly expressed | mmu-miR-32-4395220     | 36.99 | 40.00 | 1 | 0.14 |
| Significantly expressed | mmu-miR-324-3p-4395639 | 27.97 | 40.00 | 1 | 0.00 |
| Significantly expressed | mmu-miR-324-5p-4373052 | 35.15 | 35.94 | 1 | 0.66 |
| Significantly expressed | mmu-miR-328-4373049    | 30.97 | 31.26 | 1 | 0.93 |
| Significantly expressed | mmu-miR-329-4373336    | 37.07 | 40.00 | 1 | 0.15 |
| Significantly expressed | mmu-miR-331-3p-4373046 | 30.09 | 31.46 | 1 | 0.44 |
| Significantly expressed | mmu-miR-335-3p-4395296 | 32.77 | 40.00 | 1 | 0.01 |



|                         |                         |       |       |   |      |
|-------------------------|-------------------------|-------|-------|---|------|
| Significantly expressed | mmu-miR-335-5p-4373045  | 31.93 | 36.94 | 1 | 0.04 |
| Significantly expressed | mmu-miR-337-5p-4395645  | 31.84 | 40.00 | 1 | 0.00 |
| Significantly expressed | mmu-miR-339-3p-4395663  | 31.50 | 32.99 | 1 | 0.40 |
| Significantly expressed | mmu-miR-339-5p-4395368  | 31.62 | 32.71 | 1 | 0.54 |
| Significantly expressed | mmu-miR-340-3p-4395370  | 36.96 | 40.00 | 1 | 0.14 |
| Significantly expressed | mmu-miR-340-5p-4395369  | 33.21 | 34.98 | 1 | 0.33 |
| Significantly expressed | mmu-miR-342-3p-4395371  | 29.97 | 31.63 | 1 | 0.36 |
| Significantly expressed | mmu-miR-342-5p-4395657  | 34.02 | 40.00 | 1 | 0.02 |
| Significantly expressed | mmu-miR-345-3p-4395659  | 35.99 | 40.00 | 1 | 0.07 |
| Significantly expressed | mmu-miR-345-5p-4395658  | 35.16 | 40.00 | 1 | 0.04 |
| Significantly expressed | mmu-miR-34a-4395168     | 28.87 | 30.93 | 1 | 0.27 |
| Significantly expressed | mmu-miR-34b-3p-4395748  | 28.70 | 29.65 | 1 | 0.59 |
| Significantly expressed | mmu-miR-34c-4373036     | 30.41 | 36.91 | 1 | 0.01 |
| Significantly expressed | mmu-miR-351-4373345     | 31.89 | 40.00 | 1 | 0.00 |
| Significantly expressed | mmu-miR-365-4373194     | 30.00 | 31.94 | 1 | 0.30 |
| Significantly expressed | mmu-miR-369-5p-4373195  | 35.97 | 40.00 | 1 | 0.07 |
| Significantly expressed | mmu-miR-375-4373027     | 34.05 | 35.94 | 1 | 0.31 |
| Significantly expressed | mmu-miR-376c-4395580    | 32.49 | 35.97 | 1 | 0.10 |
| Significantly expressed | mmu-miR-379-4373349     | 30.37 | 31.05 | 1 | 0.71 |
| Significantly expressed | mmu-miR-380-5p-4395731  | 35.96 | 40.00 | 1 | 0.07 |
| Significantly expressed | mmu-miR-382-4373019     | 35.98 | 40.00 | 1 | 0.07 |
| Significantly expressed | mmu-miR-409-3p-4395443  | 31.13 | 32.35 | 1 | 0.49 |
| Significantly expressed | mmu-miR-411-4381013     | 32.44 | 33.67 | 1 | 0.49 |
| Significantly expressed | mmu-miR-425-4380926     | 28.54 | 29.46 | 1 | 0.60 |
| Significantly expressed | mmu-miR-434-3p-4395734  | 35.70 | 35.96 | 1 | 0.95 |
| Significantly expressed | mmu-miR-434-5p-4395711  | 34.98 | 40.00 | 1 | 0.04 |
| Significantly expressed | mmu-miR-449a-4373207    | 33.50 | 34.98 | 1 | 0.41 |
| Significantly expressed | mmu-miR-451-4373360     | 35.96 | 40.00 | 1 | 0.07 |
| Significantly expressed | mmu-miR-455-4395585     | 34.09 | 40.00 | 1 | 0.02 |
| Significantly expressed | mmu-miR-465a-3p-4395574 | 36.04 | 40.00 | 1 | 0.07 |
| Significantly expressed | mmu-miR-467a-4395717    | 31.68 | 33.50 | 1 | 0.32 |
| Significantly expressed | mmu-miR-467b-4381084    | 30.20 | 31.49 | 1 | 0.46 |
| Significantly expressed | mmu-miR-467c-4395647    | 32.99 | 40.00 | 1 | 0.01 |
| Significantly expressed | mmu-miR-467e-4395698    | 30.32 | 32.02 | 1 | 0.35 |
| Significantly expressed | mmu-miR-484-4381032     | 25.10 | 26.33 | 1 | 0.49 |
| Significantly expressed | mmu-miR-486-4378096     | 29.04 | 30.93 | 1 | 0.31 |
| Significantly expressed | mmu-miR-490-4373215     | 29.90 | 40.00 | 1 | 0.00 |
| Significantly expressed | mmu-miR-494-4395476     | 32.25 | 32.98 | 1 | 0.69 |
| Significantly expressed | mmu-miR-503-4395586     | 31.99 | 40.00 | 1 | 0.00 |
| Significantly expressed | mmu-miR-532-3p-4395466  | 30.97 | 34.62 | 1 | 0.09 |
| Significantly expressed | mmu-miR-532-5p-4380928  | 30.55 | 32.36 | 1 | 0.32 |
| Significantly expressed | mmu-miR-540-3p-4378119  | 34.99 | 40.00 | 1 | 0.04 |

|                         |                         |              |              |   |                                      |
|-------------------------|-------------------------|--------------|--------------|---|--------------------------------------|
| Significantly expressed | mmu-miR-542-3p-4378101  | 35.42        | 40.00        | 1 | 0.05                                 |
| Significantly expressed | mmu-miR-543-4395487     | 35.96        | 40.00        | 1 | 0.07                                 |
| Significantly expressed | mmu-miR-547-4395694     | 31.70        | 40.00        | 1 | 0.00                                 |
| Significantly expressed | mmu-miR-574-3p-4395460  | 27.62        | 28.68        | 1 | 0.55                                 |
| Significantly expressed | mmu-miR-582-5p-4395696  | 34.98        | 40.00        | 1 | 0.04                                 |
| Significantly expressed | mmu-miR-652-4395463     | 33.75        | 34.00        | 1 | 0.95                                 |
| Significantly expressed | mmu-miR-654-3p-4395350  | 33.19        | 34.10        | 1 | 0.61                                 |
| Significantly expressed | mmu-miR-669a-4381091    | 30.58        | 31.15        | 1 | 0.77                                 |
| Significantly expressed | mmu-miR-671-3p-4395433  | 33.00        | 34.94        | 1 | 0.30                                 |
| Significantly expressed | mmu-miR-672-4395438     | 35.11        | 40.00        | 1 | 0.04                                 |
| Significantly expressed | mmu-miR-674-4395193     | 29.26        | 30.12        | 1 | 0.63                                 |
| Significantly expressed | mmu-miR-675-3p-4386762  | 29.91        | 31.40        | 1 | 0.41                                 |
| Significantly expressed | mmu-miR-676-4386776     | 29.51        | 31.12        | 1 | 0.37                                 |
| Significantly expressed | mmu-miR-682-4381081     | 32.05        | 40.00        | 1 | 0.00                                 |
| Significantly expressed | mmu-miR-744-4395435     | 31.20        | 32.62        | 1 | 0.43                                 |
| Significantly expressed | mmu-miR-7b-4395685      | 35.98        | 40.00        | 1 | 0.07                                 |
| Significantly expressed | mmu-miR-872-4395375     | 31.81        | 32.95        | 1 | 0.52                                 |
| Significantly expressed | mmu-miR-873-4395467     | 31.70        | 40.00        | 1 | 0.00                                 |
| Significantly expressed | mmu-miR-883b-3p-4395695 | 32.43        | 33.17        | 1 | 0.68                                 |
| Significantly expressed | mmu-miR-92a-4373013     | 26.94        | 28.54        | 1 | 0.37                                 |
| Significantly expressed | mmu-miR-93-4373302      | 28.95        | 30.72        | 1 | 0.34                                 |
| Significantly expressed | mmu-miR-9-4373285       | 30.69        | 31.97        | 1 | 0.47                                 |
| Significantly expressed | mmu-miR-96-4373372      | 33.11        | 36.94        | 1 | 0.08                                 |
| Significantly expressed | mmu-miR-99a-4373008     | 29.98        | 31.50        | 1 | 0.40                                 |
| Significantly expressed | mmu-miR-99b-4373007     | 29.00        | 29.73        | 1 | 0.69                                 |
| Rat                     | rno-miR-190b-4395749    | 32.35        | 38.43        |   |                                      |
| Rat                     | rno-miR-196c-4395750    | 32.20        | 33.41        | 1 | 0.355 Averages                       |
| Rat                     | rno-miR-224-4373187     | 34.62        | 34.95        | 1 | 0.249 Standard Deviations            |
| Rat                     | rno-miR-327-4381108     | 32.63        | 33.20        |   |                                      |
| Rat                     | rno-miR-339-3p-4395760  | 32.49        | 40.00        |   | 183 Total miRNAs day 3 > day 4       |
| Rat                     | rno-miR-343-4381123     | 34.53        | 40.00        |   |                                      |
| Rat                     | rno-miR-345-3p-4395762  | 33.94        | 40.00        |   | 64.48 % decrease of miRNA expression |
| Rat                     | rno-miR-532-5p-4395752  | 30.92        | 32.86        |   |                                      |
| Rat                     | rno-miR-673-4395755     | 36.21        | 37.19        |   |                                      |
| Housekeeping            | snoRNA135-4380912       | 25.96        | 26.41        |   |                                      |
| Housekeeping            | snoRNA202-4380914       | 22.96        | 23.41        |   |                                      |
| Housekeeping            | U87-4386735             | 28.68        | 28.96        |   |                                      |
| Housekeeping            | Y1-4386739              | 29.96        | 30.27        |   |                                      |
| Housekeeping            | <b>MammU6-4395470</b>   | <b>18.56</b> | <b>18.75</b> |   |                                      |
| Housekeeping            | <b>MammU6-4395470</b>   | <b>18.56</b> | <b>18.75</b> |   |                                      |
| Housekeeping            | <b>MammU6-4395470</b>   | <b>18.56</b> | <b>18.75</b> |   |                                      |
| Housekeeping            | <b>MammU6-4395470</b>   | <b>18.56</b> | <b>18.75</b> |   |                                      |

**Table S3. Low density miRNA microarray data day 4 and 5**

| Detection   | miRNA name and reference | Ct values |        |        |
|-------------|--------------------------|-----------|--------|--------|
|             |                          | DAY3      | DAY4   | DAYS   |
| ND on day 3 | mmu-miR-1-4395333        | 40        | 36.99  | 40     |
| ND on day 3 | rno-miR-20b-3p-4395753   | 40        | 40     | 32.886 |
| ND on day 3 | mmu-miR-105-4395595      | 40        | 40     | 33.986 |
| ND on day 3 | mmu-miR-107-4373154      | 40        | 40     | 40     |
| ND on day 3 | mmu-miR-122-4395356      | 40        | 40     | 40     |
| ND on day 3 | mmu-miR-124-4373295      | 40        | 40     | 33.902 |
| ND on day 3 | mmu-miR-133b-4395358     | 40        | 40     | 40     |
| ND on day 3 | mmu-miR-137-4373301      | 40        | 40     | 40     |
| ND on day 3 | mmu-miR-139-3p-4395676   | 40        | 40     | 40     |
| ND on day 3 | mmu-miR-142-3p-4373136   | 40        | 40     | 40     |
| ND on day 3 | mmu-miR-147-4395373      | 40        | 40     | 40     |
| ND on day 3 | mmu-miR-150-4373127      | 40        | 40     | 36.933 |
| ND on day 3 | mmu-miR-153-4373305      | 40        | 40     | 40     |
| ND on day 3 | mmu-miR-154-4373270      | 40        | 40     | 40     |
| ND on day 3 | mmu-miR-200a-4378069     | 40        | 40     | 40     |
| ND on day 3 | mmu-miR-200c-4395411     | 40        | 40     | 34.994 |
| ND on day 3 | mmu-miR-201-4395708      | 40        | 40     | 40     |
| ND on day 3 | mmu-miR-202-5p-4395709   | 40        | 40     | 40     |
| ND on day 3 | mmu-miR-205-4373093      | 40        | 40     | 40     |
| ND on day 3 | mmu-miR-208b-4395401     | 40        | 40     | 40     |
| ND on day 3 | mmu-miR-215-4373316      | 40        | 40     | 35.973 |
| ND on day 3 | mmu-miR-216a-4395331     | 40        | 40     | 40     |
| ND on day 3 | mmu-miR-216b-4395437     | 40        | 40     | 40     |
| ND on day 3 | mmu-miR-219-4373080      | 40        | 40     | 40     |
| ND on day 3 | mmu-miR-291a-3p-4395722  | 40        | 40     | 40     |
| ND on day 3 | mmu-miR-291b-5p-4395667  | 40        | 40     | 40     |
| ND on day 3 | mmu-miR-292-3p-4395723   | 40        | 40     | 40     |
| ND on day 3 | mmu-miR-293-4386754      | 40        | 40     | 40     |
| ND on day 3 | mmu-miR-294-4373326      | 40        | 35.99  | 35.196 |
| ND on day 3 | mmu-miR-295-4373327      | 40        | 40     | 35.959 |
| ND on day 3 | mmu-miR-302a-4378070     | 40        | 36.098 | 40     |
| ND on day 3 | mmu-miR-302c-4395688     | 40        | 40     | 40     |
| ND on day 3 | mmu-miR-302d-4373063     | 40        | 40     | 40     |
| ND on day 3 | mmu-miR-325-4395640      | 40        | 40     | 40     |
| ND on day 3 | mmu-miR-330-4395341      | 40        | 40     | 40     |
| ND on day 3 | rno-miR-333-4381109      | 40        | 32.688 | 32.904 |
| ND on day 3 | rno-miR-336-4381111      | 40        | 34.757 | 40     |
| ND on day 3 | mmu-miR-338-3p-4395363   | 40        | 40     | 40     |
| ND on day 3 | mmu-miR-344-4373340      | 40        | 40     | 32.128 |
| ND on day 3 | rno-miR-344-3p-4381112   | 40        | 30.965 | 40     |
| ND on day 3 | rno-miR-344-5p-4395761   | 40        | 40     | 30.889 |
| ND on day 3 | mmu-miR-346-4373342      | 40        | 40     | 40     |
| ND on day 3 | rno-miR-349-4381115      | 40        | 40     | 40     |
| ND on day 3 | mmu-miR-361-4373035      | 40        | 40     | 35.993 |
| ND on day 3 | mmu-miR-367-4373034      | 40        | 40     | 36.979 |
| ND on day 3 | mmu-miR-369-3p-4373032   | 40        | 40     | 40     |
| ND on day 3 | mmu-miR-370-4395386      | 40        | 40     | 40     |
| ND on day 3 | mmu-miR-376a-4373347     | 40        | 40     | 35.15  |
| ND on day 3 | mmu-miR-377-4373025      | 40        | 40     | 40     |
| ND on day 3 | rno-miR-377-4381100      | 40        | 11.067 | 30.352 |
| ND on day 3 | mmu-miR-380-3p-4373350   | 40        | 35.993 | 40     |
| ND on day 3 | mmu-miR-381-4373020      | 40        | 34.034 | 30.551 |
| ND on day 3 | mmu-miR-384-3p-4395733   | 40        | 40     | 40     |
| ND on day 3 | mmu-miR-384-5p-4395732   | 40        | 40     | 35.946 |
| ND on day 3 | mmu-miR-409-5p-4395442   | 40        | 40     | 40     |
| ND on day 3 | rno-miR-421-4381122      | 40        | 40     | 40     |
| ND on day 3 | mmu-miR-423-5p-4395451   | 40        | 40     | 40     |
| ND on day 3 | mmu-miR-429-4373355      | 40        | 40     | 40     |
| ND on day 3 | mmu-miR-431-4395173      | 40        | 40     | 40     |
| ND on day 3 | mmu-miR-433-4373205      | 40        | 31.384 | 30.957 |
| ND on day 3 | mmu-miR-448-4373206      | 40        | 40     | 40     |
| ND on day 3 | mmu-miR-449b-4395669     | 40        | 40     | 40     |
| ND on day 3 | mmu-miR-450a-5p-4395414  | 40        | 40     | 40     |
| ND on day 3 | mmu-miR-453-4395614      | 40        | 40     | 40     |
| ND on day 3 | mmu-miR-465b-5p-4395615  | 40        | 40     | 40     |
| ND on day 3 | rno-miR-466b-4395767     | 40        | 29.834 | 40     |
| ND on day 3 | mmu-miR-466h-4395646     | 40        | 40     | 27.091 |
| ND on day 3 | mmu-miR-467d-4395648     | 40        | 37.011 | 35.077 |
| ND on day 3 | mmu-miR-470-4395718      | 40        | 40     | 40     |
| ND on day 3 | mmu-miR-489-4378114      | 40        | 40     | 33.023 |
| ND on day 3 | mmu-miR-493-4395649      | 40        | 40     | 40     |
| ND on day 3 | mmu-miR-497-4381046      | 40        | 40     | 40     |
| ND on day 3 | mmu-miR-499-4381047      | 40        | 40     | 40     |
| ND on day 3 | mmu-miR-501-3p-4381069   | 40        | 40     | 40     |
| ND on day 3 | mmu-miR-504-4395195      | 40        | 40     | 40     |
| ND on day 3 | mmu-miR-505-4381071      | 40        | 40     | 40     |
| ND on day 3 | mmu-miR-509-5p-4395650   | 40        | 40     | 40     |

|             |                          |        |        |        |
|-------------|--------------------------|--------|--------|--------|
| ND on day 3 | mmu-miR-539-4378103      | 40     | 40     | 40     |
| ND on day 3 | mmu-miR-540-5p-4395691   | 40     | 40     | 40     |
| ND on day 3 | ath-miR159a-4373390      | 40     | 40     | 40     |
| ND on day 3 | mmu-miR-542-5p-4395693   | 40     | 40     | 34.972 |
| ND on day 3 | rno-miR-543-4395766      | 40     | 40     | 40     |
| ND on day 3 | mmu-miR-551b-4380945     | 40     | 40     | 40     |
| ND on day 3 | mmu-miR-582-3p-4395697   | 40     | 40     | 40     |
| ND on day 3 | mmu-miR-590-5p-4395176   | 40     | 34.144 | 34.951 |
| ND on day 3 | mmu-miR-598-4395606      | 40     | 40     | 40     |
| ND on day 3 | rno-miR-598-5p-4395754   | 40     | 40     | 40     |
| ND on day 3 | mmu-miR-615-3p-4386777   | 40     | 40     | 40     |
| ND on day 3 | mmu-miR-615-5p-4395464   | 40     | 40     | 40     |
| ND on day 3 | mmu-miR-654-5p-4395652   | 40     | 40     | 40     |
| ND on day 3 | mmu-miR-665-4395737      | 40     | 30.267 | 29.336 |
| ND on day 3 | mmu-miR-666-5p-4386770   | 40     | 30.725 | 28.81  |
| ND on day 3 | mmu-miR-742-4395573      | 40     | 40     | 40     |
| ND on day 3 | rno-miR-742-4395756      | 40     | 40     | 40     |
| ND on day 3 | mmu-miR-743b-3p-4395601  | 40     | 40     | 40     |
| ND on day 3 | mmu-miR-743b-5p-4395600  | 40     | 17.849 | 33.087 |
| ND on day 3 | rno-miR-758-4395180      | 40     | 32.939 | 40     |
| ND on day 3 | rno-miR-760-5p-4395758   | 40     | 40     | 40     |
| ND on day 3 | mmu-miR-770-3p-4395564   | 40     | 40     | 40     |
| ND on day 3 | mmu-miR-802-4395566      | 40     | 40     | 40     |
| ND on day 3 | mmu-miR-871-4395465      | 40     | 40     | 40     |
| ND on day 3 | rno-miR-871-4395770      | 40     | 40     | 40     |
| ND on day 3 | mmu-miR-874-4395379      | 40     | 40     | 40     |
| ND on day 3 | mmu-miR-875-3p-4395677   | 40     | 40     | 40     |
| ND on day 3 | mmu-miR-876-3p-4395594   | 40     | 40     | 40     |
| ND on day 3 | mmu-miR-876-5p-4395593   | 40     | 40     | 40     |
| ND on day 3 | rno-miR-878-4395771      | 40     | 40     | 32.246 |
| ND on day 3 | mmu-miR-878-5p-4395670   | 40     | 40     | 40     |
| ND on day 3 | mmu-miR-879-4395602      | 40     | 40     | 40     |
| ND on day 3 | mmu-miR-881-4395739      | 40     | 40     | 40     |
| ND on day 3 | rno-miR-881-4395773      | 40     | 40     | 40     |
| ND on day 3 | mmu-miR-883a-3p-4395591  | 40     | 40     | 40     |
| ND on day 3 | mmu-miR-883a-5p-4395741  | 40     | 40     | 40     |
| ND on day 3 | rno-miR-219-1-3p-4395778 | 40     | 34.089 | 40     |
| ND on day 3 | rno-miR-219-2-3p-4395501 | 40     | 40     | 40     |
| ND on day 3 | rno-miR-381-4381102      | 40     | 31.186 | 40     |
| ND on day 3 | rno-miR-409-5p-4381098   | 40     | 40     | 40     |
| ND on day 3 | rno-miR-450a-4381124     | 40     | 40     | 40     |
| ND on day 3 | mmu-miR-452-4373281      | 40     | 40     | 40     |
| ND on day 3 | mmu-miR-464-4373362      | 40     | 40     | 40     |
| ND on day 3 | mmu-miR-468-4373366      | 40     | 33.756 | 31.968 |
| ND on day 3 | mmu-miR-469-4373367      | 40     | 40     | 40     |
| ND on day 3 | mmu-miR-488-4381074      | 40     | 40     | 40     |
| ND on day 3 | mmu-miR-496-4386771      | 40     | 40     | 40     |
| ND on day 3 | rno-miR-505-4381097      | 40     | 40     | 40     |
| ND on day 3 | mmu-miR-668-4386767      | 40     | 40     | 40     |
| ND on day 3 | mmu-miR-670-4395561      | 40     | 40     | 40     |
| ND on day 3 | mmu-miR-675-5p-4386761   | 40     | 40     | 40     |
| ND on day 3 | mmu-miR-677-4381075      | 40     | 40     | 40     |
| ND on day 3 | mmu-miR-679-4381077      | 40     | 40     | 40     |
| ND on day 3 | mmu-miR-683-4381082      | 40     | 40     | 40     |
| ND on day 3 | mmu-miR-684-4381083      | 40     | 40     | 36.06  |
| ND on day 3 | mmu-miR-686-4381085      | 40     | 40     | 40     |
| ND on day 3 | mmu-miR-23a-4373074      | 40     | 32     | 40     |
| ND on day 3 | mmu-miR-129-5p-4373171   | 40     | 40     | 40     |
| ND on day 3 | mmu-miR-188-3p-4395217   | 40     | 40     | 40     |
| ND on day 3 | mmu-miR-302b-4378071     | 40     | 40     | 40     |
| ND on day 4 | mmu-miR-329-4373336      | 37.071 | 40     | 40     |
| ND on day 4 | mmu-miR-340-3p-4395370   | 36.96  | 40     | 40     |
| ND on day 4 | mmu-miR-200b-4395362     | 36.072 | 40     | 40     |
| ND on day 4 | mmu-miR-10b-4395329      | 36.006 | 40     | 40     |
| ND on day 4 | mmu-miR-148b-4373129     | 35.995 | 40     | 40     |
| ND on day 4 | mmu-miR-345-3p-4395659   | 35.993 | 40     | 40     |
| ND on day 4 | mmu-miR-382-4373019      | 35.981 | 40     | 40     |
| ND on day 4 | mmu-miR-7b-4395685       | 35.975 | 40     | 40     |
| ND on day 4 | mmu-miR-369-5p-4373195   | 35.967 | 40     | 40     |
| ND on day 4 | mmu-miR-543-4395487      | 35.964 | 40     | 40     |
| ND on day 4 | mmu-miR-451-4373360      | 35.963 | 40     | 40     |
| ND on day 4 | mmu-miR-18b-4395596      | 35.709 | 40     | 40     |
| ND on day 4 | mmu-miR-345-5p-4395658   | 35.164 | 40     | 40     |
| ND on day 4 | mmu-miR-133a-4395357     | 35.015 | 40     | 40     |
| ND on day 4 | mmu-miR-540-3p-4378119   | 34.993 | 40     | 40     |
| ND on day 4 | mmu-miR-582-5p-4395696   | 34.984 | 40     | 40     |
| ND on day 4 | mmu-miR-434-5p-4395711   | 34.98  | 40     | 40     |
| ND on day 4 | mmu-miR-217-4395686      | 34.554 | 40     | 40     |
| ND on day 4 | mmu-miR-455-4395585      | 34.089 | 40     | 40     |
| ND on day 4 | mmu-miR-342-5p-4395657   | 34.023 | 40     | 40     |
| ND on day 4 | mmu-miR-296-3p-4395212   | 34.018 | 40     | 40     |
| ND on day 4 | mmu-miR-211-4373315      | 33.032 | 40     | 40     |
| ND on day 4 | mmu-miR-199a-5p-4373272  | 32.997 | 40     | 40     |
| ND on day 4 | mmu-miR-467c-4395647     | 32.986 | 40     | 40     |
| ND on day 4 | mmu-miR-547-4395694      | 31.705 | 40     | 40     |

| ND on day 4             | mmu-miR-298-4395728     | 30.076 | 40     | 40     |                                            |       |
|-------------------------|-------------------------|--------|--------|--------|--------------------------------------------|-------|
| ND on day 4             | mmu-miR-490-4373215     | 29.902 | 40     | 40     | 2 <sup>Δ</sup> -(DDCt) using U6 as control |       |
| ND on day 4             | mmu-miR-290-3p-4395721  | 13.674 | 40     | 40     | DAY4                                       | DAY5  |
| unconclusive            | mmu-miR-103-4373158     | 32.658 | 33.937 | 33.001 | 1                                          | 1.137 |
| unconclusive            | mmu-miR-125a-3p-4395310 | 31.34  | 34.819 | 32.263 | 1                                          | 3.496 |
| unconclusive            | mmu-miR-125b-3p-4395489 | 32.52  | 40     | 33.988 | 1                                          | 38.36 |
| unconclusive            | mmu-miR-129-3p-4373297  | 29.726 | 40     | 30.926 | 1                                          | 320.4 |
| unconclusive            | mmu-miR-139-5p-4395400  | 35.94  | 38.419 | 32.338 | 1                                          | 40.25 |
| unconclusive            | mmu-miR-146a-4373132    | 31.488 | 32.959 | 32.093 | 1                                          | 1.084 |
| unconclusive            | mmu-miR-152-4395170     | 31.902 | 33.948 | 32.973 | 1                                          | 1.168 |
| unconclusive            | mmu-miR-15a-4373123     | 31.004 | 34.731 | 33.769 | 1                                          | 1.158 |
| unconclusive            | mmu-miR-184-4373113     | 36.438 | 40     | 36.929 | 1                                          | 4.994 |
| unconclusive            | mmu-miR-190-4373110     | 30.955 | 34.869 | 31.933 | 1                                          | 4.549 |
| unconclusive            | mmu-miR-194-4373106     | 29.695 | 33.07  | 30.35  | 1                                          | 3.917 |
| unconclusive            | mmu-miR-202-3p-4373311  | 32.024 | 31.348 | 30.592 | 1                                          | 1.004 |
| unconclusive            | mmu-miR-204-4373094     | 32.911 | 34.224 | 31.88  | 1                                          | 3.019 |
| unconclusive            | mmu-miR-208-4373091     | 28.677 | 29.94  | 28.683 | 1                                          | 1.42  |
| unconclusive            | mmu-miR-224-4395683     | 34.965 | 36.91  | 35.295 | 1                                          | 1.821 |
| unconclusive            | mmu-miR-323-3p-4395338  | 36.032 | 40     | 32.94  | 1                                          | 79.31 |
| unconclusive            | mmu-miR-32-4395220      | 36.991 | 40     | 34.231 | 1                                          | 32.42 |
| unconclusive            | mmu-miR-324-3p-4395639  | 27.967 | 40     | 29.9   | 1                                          | 652.4 |
| unconclusive            | mmu-miR-335-3p-4395296  | 32.774 | 40     | 33.983 | 1                                          | 38.49 |
| unconclusive            | mmu-miR-335-5p-4373045  | 31.926 | 36.937 | 32.18  | 1                                          | 16.08 |
| unconclusive            | mmu-miR-337-5p-4395645  | 31.844 | 40     | 35.277 | 1                                          | 15.7  |
| unconclusive            | mmu-miR-339-3p-4395663  | 31.499 | 32.991 | 31.999 | 1                                          | 1.182 |
| unconclusive            | mmu-miR-34a-4395168     | 28.87  | 30.935 | 29.99  | 1                                          | 1.144 |
| unconclusive            | mmu-miR-34c-4373036     | 30.412 | 36.906 | 33.856 | 1                                          | 4.922 |
| unconclusive            | mmu-miR-351-4373345     | 31.895 | 40     | 34.245 | 1                                          | 32.1  |
| unconclusive            | mmu-miR-362-3p-4395746  | 36.852 | 36.978 | 32.745 | 1                                          | 11.18 |
| unconclusive            | mmu-miR-375-4373027     | 34.05  | 35.936 | 34.786 | 1                                          | 1.319 |
| unconclusive            | mmu-miR-376c-4395580    | 32.491 | 35.966 | 33.266 | 1                                          | 3.861 |
| unconclusive            | mmu-miR-380-5p-4395731  | 35.96  | 40     | 35.762 | 1                                          | 11.21 |
| unconclusive            | mmu-miR-450b-5p-4386779 | 32.998 | 32.568 | 30.991 | 1                                          | 1.774 |
| unconclusive            | mmu-miR-465a-3p-4395574 | 36.042 | 40     | 35.165 | 1                                          | 16.97 |
| unconclusive            | mmu-miR-486-4378096     | 29.044 | 30.934 | 30.12  | 1                                          | 1.045 |
| unconclusive            | mmu-miR-494-4395476     | 32.255 | 32.984 | 32.184 | 1                                          | 1.035 |
| unconclusive            | mmu-miR-503-4395586     | 31.994 | 40     | 33.971 | 1                                          | 38.81 |
| unconclusive            | mmu-miR-542-3p-4378101  | 35.419 | 40     | 35.837 | 1                                          | 10.64 |
| unconclusive            | mmu-miR-672-4395438     | 35.105 | 40     | 37.704 | 1                                          | 2.918 |
| unconclusive            | mmu-miR-675-3p-4386762  | 29.908 | 31.399 | 5.5695 | 1                                          | 4E+07 |
| unconclusive            | mmu-miR-680-4381079     | 29.985 | 29.523 | 28.671 | 1                                          | 1.073 |
| unconclusive            | mmu-miR-682-4381081     | 32.045 | 40     | 32.81  | 1                                          | 86.79 |
| unconclusive            | mmu-miR-873-4395467     | 31.697 | 40     | 34.078 | 1                                          | 36.03 |
| rat                     | rno-miR-17-3p-4395779   | 36.668 | 35.931 | 34.522 | 1                                          | 1.578 |
| rat                     | rno-miR-190b-4395749    | 32.346 | 38.427 | 36.911 | 1                                          | 1.7   |
| rat                     | rno-miR-224-4373187     | 34.616 | 34.948 | 34.19  | 1                                          | 1.005 |
| rat                     | rno-miR-339-3p-4395760  | 32.487 | 40     | 35.951 | 1                                          | 9.836 |
| rat                     | rno-miR-343-4381123     | 34.528 | 40     | 33.085 | 1                                          | 71.71 |
| rat                     | rno-miR-345-3p-4395762  | 33.941 | 40     | 34.716 | 1                                          | 23.16 |
| Housekeeping            | snoRNA202-4380914       | 22.962 | 23.414 | 22.446 | 1                                          | 1.163 |
| Significantly expressed | mmu-let-7a-4373169      | 31.489 | 34.001 | 35.161 | 1                                          | 0.266 |
| Significantly expressed | mmu-let-7b-4373168      | 32.558 | 32.967 | 35.926 | 1                                          | 0.076 |
| Significantly expressed | mmu-let-7c-4373167      | 30.772 | 31.526 | 32.95  | 1                                          | 0.221 |
| Significantly expressed | mmu-let-7d-4395394      | 31.177 | 32.523 | 33.982 | 1                                          | 0.216 |
| Significantly expressed | mmu-let-7e-4395517      | 29.361 | 30.982 | 31.752 | 1                                          | 0.349 |
| Significantly expressed | mmu-let-7f-4373164      | 31.081 | 32.435 | 33.974 | 1                                          | 0.205 |
| Significantly expressed | mmu-let-7g-4395393      | 29.879 | 30.976 | 31.929 | 1                                          | 0.307 |
| Significantly expressed | mmu-let-7i-4395332      | 30.175 | 30.89  | 31.969 | 1                                          | 0.281 |
| Significantly expressed | mmu-miR-100-4373160     | 30.391 | 31.055 | 31.981 | 1                                          | 0.313 |
| Significantly expressed | mmu-miR-101a-4395364    | 32.667 | 35.614 | 35.972 | 1                                          | 0.464 |
| Significantly expressed | mmu-miR-106a-4395589    | 25.625 | 27.184 | 27.95  | 1                                          | 0.35  |
| Significantly expressed | mmu-miR-106b-4373155    | 31.406 | 31.951 | 33.246 | 1                                          | 0.242 |
| Significantly expressed | mmu-miR-10a-4373153     | 31.116 | 34.2   | 36.92  | 1                                          | 0.09  |
| Significantly expressed | mmu-miR-125a-5p-4395309 | 26.383 | 27.96  | 28.259 | 1                                          | 0.483 |
| Significantly expressed | mmu-miR-125b-5p-4373148 | 25.955 | 27.455 | 27.977 | 1                                          | 0.414 |
| Significantly expressed | mmu-miR-126-3p-4395339  | 30.257 | 31.964 | 32.926 | 1                                          | 0.305 |
| Significantly expressed | mmu-miR-126-5p-4373269  | 32.747 | 32.961 | 34.901 | 1                                          | 0.155 |

|                         |                         |        |        |        |   |       |
|-------------------------|-------------------------|--------|--------|--------|---|-------|
| Significantly expressed | mmu-miR-127-4373147     | 29.786 | 31.854 | 31.193 | 1 | 0.94  |
| Significantly expressed | mmu-miR-128a-4395327    | 35.06  | 33.908 | 35.988 | 1 | 0.141 |
| Significantly expressed | mmu-miR-130a-4373145    | 31.315 | 32.979 | 32.35  | 1 | 0.919 |
| Significantly expressed | mmu-miR-130b-4373144    | 29.743 | 30.932 | 36.069 | 1 | 0.017 |
| Significantly expressed | mmu-miR-132-4373143     | 28     | 29.521 | 30.005 | 1 | 0.425 |
| Significantly expressed | mmu-miR-134-4373299     | 32.284 | 34.011 | 40     | 1 | 0.009 |
| Significantly expressed | mmu-miR-135a-4373140    | 32.477 | 33.368 | 36.989 | 1 | 0.048 |
| Significantly expressed | mmu-miR-135b-4395372    | 32.608 | 33.726 | 34.032 | 1 | 0.481 |
| Significantly expressed | mmu-miR-136-4395641     | 32.741 | 33.754 | 36.967 | 1 | 0.064 |
| Significantly expressed | mmu-miR-138-4395395     | 34.578 | 35.984 | 40     | 1 | 0.037 |
| Significantly expressed | mmu-miR-140-4373374     | 28.942 | 29.763 | 30.749 | 1 | 0.3   |
| Significantly expressed | mmu-miR-141-4373137     | 35.975 | 34.777 | 36.255 | 1 | 0.213 |
| Significantly expressed | mmu-miR-142-5p-4395359  | 35.219 | 35.833 | 40     | 1 | 0.033 |
| Significantly expressed | mmu-miR-143-4395360     | 29.996 | 31.395 | 31.963 | 1 | 0.401 |
| Significantly expressed | mmu-miR-145-4395389     | 26.97  | 28.609 | 29.678 | 1 | 0.283 |
| Significantly expressed | mmu-miR-146b-4373178    | 31.263 | 32.556 | 34.993 | 1 | 0.11  |
| Significantly expressed | mmu-miR-148a-4373130    | 33.979 | 33.449 | 33.801 | 1 | 0.466 |
| Significantly expressed | mmu-miR-151-3p-4373304  | 28.966 | 31.029 | 40     | 1 | 0.001 |
| Significantly expressed | mmu-miR-155-4395701     | 28.605 | 29.925 | 30.666 | 1 | 0.356 |
| Significantly expressed | mmu-miR-15b-4373122     | 28.66  | 29.956 | 30.46  | 1 | 0.419 |
| Significantly expressed | mmu-miR-16-4373121      | 24.062 | 25.36  | 25.953 | 1 | 0.394 |
| Significantly expressed | mmu-miR-17-4395419      | 25.291 | 26.939 | 27.543 | 1 | 0.391 |
| Significantly expressed | mmu-miR-181a-4373117    | 34.652 | 34.969 | 34.422 | 1 | 0.868 |
| Significantly expressed | mmu-miR-181c-4373115    | 33.584 | 37.022 | 40     | 1 | 0.075 |
| Significantly expressed | mmu-miR-182-4395729     | 29.137 | 30.741 | 30.968 | 1 | 0.508 |
| Significantly expressed | mmu-miR-183-4395380     | 31.965 | 33.889 | 40     | 1 | 0.009 |
| Significantly expressed | mmu-miR-185-4395382     | 33.18  | 34.021 | 40     | 1 | 0.009 |
| Significantly expressed | mmu-miR-186-4395396     | 28.459 | 29.399 | 29.938 | 1 | 0.409 |
| Significantly expressed | mmu-miR-187-4373307     | 31.585 | 33.917 | 40     | 1 | 0.009 |
| Significantly expressed | mmu-miR-188-5p-4395431  | 32.917 | 33.977 | 33.616 | 1 | 0.764 |
| Significantly expressed | mmu-miR-18a-4395533     | 32.978 | 33.895 | 33.963 | 1 | 0.567 |
| Significantly expressed | mmu-miR-191-4395410     | 25.964 | 27.314 | 27.909 | 1 | 0.394 |
| Significantly expressed | mmu-miR-192-4373108     | 33.319 | 32.715 | 32.962 | 1 | 0.501 |
| Significantly expressed | mmu-miR-193-4395361     | 31.965 | 32.957 | 33.871 | 1 | 0.316 |
| Significantly expressed | mmu-miR-193b-4395597    | 28.237 | 29.894 | 29.975 | 1 | 0.562 |
| Significantly expressed | mmu-miR-195-4373105     | 29.411 | 30.963 | 31.384 | 1 | 0.444 |
| Significantly expressed | mmu-miR-196b-4395326    | 30.726 | 31.97  | 32.898 | 1 | 0.312 |
| Significantly expressed | mmu-miR-197-4373102     | 32.573 | 31.825 | 32.975 | 1 | 0.268 |
| Significantly expressed | mmu-miR-199a-3p-4395415 | 27.3   | 28.735 | 29.969 | 1 | 0.253 |
| Significantly expressed | mmu-miR-19a-4373099     | 26.563 | 27.978 | 28.548 | 1 | 0.4   |
| Significantly expressed | mmu-miR-19b-4373098     | 23.289 | 24.489 | 24.966 | 1 | 0.427 |
| Significantly expressed | mmu-miR-203-4373095     | 32.717 | 33.942 | 33.969 | 1 | 0.583 |

|                         |                         |        |        |        |   |       |
|-------------------------|-------------------------|--------|--------|--------|---|-------|
| Significantly expressed | mmu-miR-207-4373314     | 29.549 | 28.106 | 27.457 | 1 | 0.932 |
| Significantly expressed | mmu-miR-20a-4373286     | 26.229 | 27.95  | 28.661 | 1 | 0.363 |
| Significantly expressed | mmu-miR-20b-4373263     | 31.86  | 34.534 | 34.973 | 1 | 0.439 |
| Significantly expressed | mmu-miR-210-4373089     | 27.767 | 29.147 | 30.003 | 1 | 0.328 |
| Significantly expressed | mmu-miR-21-4373090      | 26.921 | 27.866 | 28.981 | 1 | 0.274 |
| Significantly expressed | mmu-miR-214-4395417     | 27.827 | 29.242 | 30.971 | 1 | 0.179 |
| Significantly expressed | mmu-miR-218-4373081     | 29.305 | 30.931 | 31.949 | 1 | 0.294 |
| Significantly expressed | mmu-miR-220-4395598     | 34.015 | 38.058 | 40     | 1 | 0.155 |
| Significantly expressed | mmu-miR-221-4373077     | 27.744 | 31.03  | 30.623 | 1 | 0.788 |
| Significantly expressed | mmu-miR-222-4395387     | 25.571 | 26.424 | 26.926 | 1 | 0.42  |
| Significantly expressed | mmu-miR-223-4395406     | 33.968 | 32.745 | 34.323 | 1 | 0.199 |
| Significantly expressed | mmu-miR-23b-4373073     | 31.774 | 33.972 | 40     | 1 | 0.009 |
| Significantly expressed | mmu-miR-24-4373072      | 24.106 | 25.448 | 25.967 | 1 | 0.415 |
| Significantly expressed | mmu-miR-25-4373071      | 31.734 | 31.722 | 32.943 | 1 | 0.255 |
| Significantly expressed | mmu-miR-26a-4395166     | 28.156 | 29.34  | 29.974 | 1 | 0.383 |
| Significantly expressed | mmu-miR-26b-4395167     | 28.878 | 29.965 | 30.53  | 1 | 0.402 |
| Significantly expressed | mmu-miR-27a-4373287     | 30.935 | 31.888 | 31.943 | 1 | 0.572 |
| Significantly expressed | mmu-miR-27b-4373068     | 32.628 | 31.946 | 32.58  | 1 | 0.383 |
| Significantly expressed | mmu-miR-28-4373067      | 30.623 | 31.933 | 32.576 | 1 | 0.38  |
| Significantly expressed | mmu-miR-296-5p-4373066  | 29.934 | 30.743 | 30.982 | 1 | 0.504 |
| Significantly expressed | mmu-miR-297b-5p-4381049 | 34.041 | 33.219 | 40     | 1 | 0.005 |
| Significantly expressed | mmu-miR-297c-4395610    | 29.111 | 28.183 | 29.84  | 1 | 0.188 |
| Significantly expressed | mmu-miR-29a-4395223     | 24.14  | 25.411 | 25.916 | 1 | 0.419 |
| Significantly expressed | mmu-miR-29b-4373288     | 33.29  | 33.958 | 34.61  | 1 | 0.378 |
| Significantly expressed | mmu-miR-29c-4395171     | 27.42  | 28.971 | 29.38  | 1 | 0.448 |
| Significantly expressed | mmu-miR-301a-4373064    | 30.953 | 31.492 | 33.584 | 1 | 0.139 |
| Significantly expressed | mmu-miR-301b-4395730    | 31.311 | 32.011 | 33.967 | 1 | 0.153 |
| Significantly expressed | mmu-miR-30a-4373061     | 30.807 | 31.93  | 32.718 | 1 | 0.344 |
| Significantly expressed | mmu-miR-30b-4373290     | 28.705 | 29.966 | 30.701 | 1 | 0.357 |
| Significantly expressed | mmu-miR-30c-4373060     | 28.93  | 29.785 | 30.959 | 1 | 0.263 |
| Significantly expressed | mmu-miR-30d-4373059     | 31.962 | 32.892 | 33.068 | 1 | 0.526 |
| Significantly expressed | mmu-miR-30e-4395334     | 28.914 | 30.35  | 30.525 | 1 | 0.527 |
| Significantly expressed | mmu-miR-31-4373331      | 24.803 | 25.729 | 25.957 | 1 | 0.507 |
| Significantly expressed | mmu-miR-320-4395388     | 29.961 | 30.753 | 31.431 | 1 | 0.372 |
| Significantly expressed | mmu-miR-322-4378107     | 31.667 | 32.684 | 35.993 | 1 | 0.06  |
| Significantly expressed | mmu-miR-324-5p-4373052  | 35.154 | 35.936 | 36.498 | 1 | 0.402 |
| Significantly expressed | mmu-miR-328-4373049     | 30.968 | 31.26  | 32.692 | 1 | 0.22  |
| Significantly expressed | mmu-miR-331-3p-4373046  | 30.086 | 31.456 | 31.983 | 1 | 0.413 |
| Significantly expressed | mmu-miR-331-5p-4395344  | 35.837 | 34.004 | 36.361 | 1 | 0.116 |
| Significantly expressed | mmu-miR-337-3p-4395662  | 36.967 | 35.717 | 40     | 1 | 0.031 |
| Significantly expressed | mmu-miR-339-5p-4395368  | 31.618 | 32.707 | 35.026 | 1 | 0.119 |
| Significantly expressed | mmu-miR-340-5p-4395369  | 33.21  | 34.976 | 40     | 1 | 0.018 |

|                         |                         |        |        |        |   |       |
|-------------------------|-------------------------|--------|--------|--------|---|-------|
| Significantly expressed | mmu-miR-342-3p-4395371  | 29.968 | 31.632 | 31.746 | 1 | 0.549 |
| Significantly expressed | mmu-miR-34b-3p-4395748  | 28.699 | 29.649 | 29.96  | 1 | 0.479 |
| Significantly expressed | mmu-miR-350-4395660     | 34.69  | 33.457 | 35.004 | 1 | 0.203 |
| Significantly expressed | mmu-miR-363-4378090     | 35.909 | 33.591 | 35.16  | 1 | 0.2   |
| Significantly expressed | mmu-miR-365-4373194     | 29.999 | 31.944 | 32.05  | 1 | 0.552 |
| Significantly expressed | mmu-miR-376b-4395582    | 34.984 | 34.516 | 35.769 | 1 | 0.249 |
| Significantly expressed | mmu-miR-379-4373349     | 30.375 | 31.051 | 34.032 | 1 | 0.075 |
| Significantly expressed | mmu-miR-383-4381093     | 34.877 | 32.324 | 33.885 | 1 | 0.201 |
| Significantly expressed | mmu-miR-409-3p-4395443  | 31.127 | 32.347 | 36.056 | 1 | 0.045 |
| Significantly expressed | mmu-miR-410-4378093     | 36.894 | 32.084 | 34.629 | 1 | 0.102 |
| Significantly expressed | mmu-miR-411-4381013     | 32.444 | 33.667 | 33.978 | 1 | 0.479 |
| Significantly expressed | mmu-miR-425-4380926     | 28.536 | 29.462 | 29.969 | 1 | 0.418 |
| Significantly expressed | mmu-miR-434-3p-4395734  | 35.7   | 35.958 | 40     | 1 | 0.036 |
| Significantly expressed | mmu-miR-449a-4373207    | 33.502 | 34.984 | 40     | 1 | 0.018 |
| Significantly expressed | mmu-miR-465a-5p-4373363 | 31.719 | 31.027 | 31.125 | 1 | 0.555 |
| Significantly expressed | mmu-miR-467a-4395717    | 31.675 | 33.499 | 35.971 | 1 | 0.107 |
| Significantly expressed | mmu-miR-467b-4381084    | 30.196 | 31.493 | 31.998 | 1 | 0.419 |
| Significantly expressed | mmu-miR-467e-4395698    | 30.319 | 32.019 | 31.684 | 1 | 0.75  |
| Significantly expressed | mmu-miR-484-4381032     | 25.103 | 26.333 | 26.952 | 1 | 0.387 |
| Significantly expressed | mmu-miR-487b-4378102    | 35.977 | 34.523 | 34.496 | 1 | 0.606 |
| Significantly expressed | mmu-miR-491-4381053     | 31.959 | 30.376 | 31.334 | 1 | 0.306 |
| Significantly expressed | mmu-miR-495-4381078     | 32.344 | 32.088 | 32.815 | 1 | 0.359 |
| Significantly expressed | mmu-miR-500-4395736     | 33.249 | 33.032 | 35.339 | 1 | 0.12  |
| Significantly expressed | mmu-miR-509-3p-4395651  | 36.006 | 33.597 | 35.099 | 1 | 0.21  |
| Significantly expressed | mmu-miR-511-4395679     | 34.458 | 32.959 | 40     | 1 | 0.005 |
| Significantly expressed | mmu-miR-532-3p-4395466  | 30.969 | 34.621 | 34.72  | 1 | 0.555 |
| Significantly expressed | mmu-miR-532-5p-4380928  | 30.548 | 32.362 | 32.968 | 1 | 0.391 |
| Significantly expressed | mmu-miR-544-4395680     | 35.184 | 34.043 | 33.931 | 1 | 0.642 |
| Significantly expressed | mmu-miR-546-4381044     | 30.879 | 29.845 | 30.932 | 1 | 0.28  |
| Significantly expressed | mmu-miR-574-3p-4395460  | 27.623 | 28.676 | 28.982 | 1 | 0.481 |
| Significantly expressed | mmu-miR-652-4395463     | 33.75  | 34.004 | 40     | 1 | 0.009 |
| Significantly expressed | mmu-miR-654-3p-4395350  | 33.193 | 34.101 | 33.771 | 1 | 0.747 |
| Significantly expressed | mmu-miR-667-4386769     | 29.964 | 29.336 | 28.964 | 1 | 0.769 |
| Significantly expressed | mmu-miR-669a-4381091    | 30.577 | 31.149 | 32.433 | 1 | 0.244 |
| Significantly expressed | mmu-miR-671-3p-4395433  | 33.002 | 34.943 | 35.968 | 1 | 0.292 |
| Significantly expressed | mmu-miR-674-4395193     | 29.258 | 30.119 | 32.023 | 1 | 0.159 |
| Significantly expressed | mmu-miR-676-4386776     | 29.512 | 31.123 | 31.96  | 1 | 0.333 |
| Significantly expressed | mmu-miR-685-4386748     | 32.042 | 29.561 | 30.42  | 1 | 0.328 |
| Significantly expressed | mmu-miR-687-4386750     | 28.578 | 27.833 | 27.674 | 1 | 0.664 |
| Significantly expressed | mmu-miR-708-4395452     | 32.405 | 31.965 | 35.97  | 1 | 0.037 |
| Significantly expressed | mmu-miR-741-4395587     | 33.276 | 32.684 | 33.693 | 1 | 0.295 |
| Significantly expressed | mmu-miR-743a-4395599    | 29.678 | 29.673 | 29.897 | 1 | 0.509 |



|                         |                         |              |              |           |                                     |                           |
|-------------------------|-------------------------|--------------|--------------|-----------|-------------------------------------|---------------------------|
| Significantly expressed | mmu-miR-744-4395435     | 31.204       | 32.624       | 35.995    | 1                                   | 0.057                     |
| Significantly expressed | mmu-miR-7a-4378130      | 34.825       | 34.95        | 40        | 1                                   | 0.018                     |
| Significantly expressed | mmu-miR-872-4395375     | 31.808       | 32.953       | 34.961    | 1                                   | 0.148                     |
| Significantly expressed | mmu-miR-883b-3p-4395695 | 32.429       | 33.166       | 33.124    | 1                                   | 0.612                     |
| Significantly expressed | mmu-miR-92a-4373013     | 26.937       | 28.54        | 28.554    | 1                                   | 0.589                     |
| Significantly expressed | mmu-miR-93-4373302      | 28.954       | 30.716       | 31.612    | 1                                   | 0.319                     |
| Significantly expressed | mmu-miR-9-4373285       | 30.69        | 31.967       | 32.323    | 1                                   | 0.464                     |
| Significantly expressed | mmu-miR-96-4373372      | 33.108       | 36.937       | 40        | 1                                   | 0.071                     |
| Significantly expressed | mmu-miR-98-4373009      | 35.99        | 34.118       | 34.833    | 1                                   | 0.362                     |
| Significantly expressed | mmu-miR-99a-4373008     | 29.982       | 31.496       | 32.222    | 1                                   | 0.36                      |
| Significantly expressed | mmu-miR-99b-4373007     | 28.996       | 29.728       | 30.773    | 1                                   | 0.288                     |
| Rat                     | rno-miR-1-4395765       | 33.991       | 32.494       | 33.834    |                                     |                           |
| Rat                     | rno-miR-196c-4395750    | 32.198       | 33.412       | 35.984    | 1                                   | 0.325 Averages            |
| Rat                     | rno-miR-207-4381096     | 28.936       | 28.869       | 28.682    | 1                                   | 0.214 Standard Deviations |
| Rat                     | rno-miR-327-4381108     | 32.629       | 33.201       | 32.972    |                                     |                           |
| Rat                     | rno-miR-346-4381113     | 28.986       | 28.49        | 29.079    | 154 Total miRNAs - day 4> day 5     |                           |
| Rat                     | rno-miR-347-4381114     | 28.797       | 28.923       | 28.624    |                                     |                           |
| Rat                     | rno-miR-351-4395764     | 32.921       | 33.056       | 35.984    | 67.5 % decrease of miRNA expression |                           |
| Rat                     | rno-miR-466c-4395768    | 34.935       | 32.716       | 40        |                                     |                           |
| Rat                     | rno-miR-532-5p-4395752  | 30.92        | 32.86        | 34.967    |                                     |                           |
| Rat                     | rno-miR-673-4395755     | 36.209       | 37.194       | 40        |                                     |                           |
| Rat                     | rno-miR-743b-4395769    | 33.03        | 32.12        | 31.995    |                                     |                           |
| Housekeeping            | snoRNA135-4380912       | 25.963       | 26.407       | 25.962    |                                     |                           |
| Housekeeping            | U87-4386735             | 28.684       | 28.959       | 28.412    |                                     |                           |
| Housekeeping            | Y1-4386739              | 29.957       | 30.27        | 29.689    |                                     |                           |
| Housekeeping            | <b>MammU6-4395470</b>   | <b>18.56</b> | <b>18.75</b> | <b>18</b> |                                     |                           |
| Housekeeping            | <b>MammU6-4395470</b>   | <b>18.56</b> | <b>18.75</b> | <b>18</b> |                                     |                           |
| Housekeeping            | <b>MammU6-4395470</b>   | <b>18.56</b> | <b>18.75</b> | <b>18</b> |                                     |                           |
| Housekeeping            | <b>MammU6-4395470</b>   | <b>18.56</b> | <b>18.75</b> | <b>18</b> |                                     |                           |
